## Calcium-independent astrocytic lipid release modulates neuronal activity through Kv channels

Fushun Wang<sup>1,2</sup>, Heather B. Bradshaw<sup>3</sup>, Salvador Pena<sup>4</sup>, Beata Jablonska<sup>5</sup>, Julia Xavier<sup>6</sup>, Sheng Gong<sup>7</sup>, Baoman Li<sup>1</sup>, Devin Chandler-Militello<sup>1</sup>, Lane K. Bekar<sup>8</sup>, and Nathan A. Smith<sup>5,9,10\*</sup>

<sup>1</sup>Departments of Neurosurgery and Neurology, University of Rochester School of Medicine and Dentistry, Rochester, NY 14642, USA.

<sup>2</sup>Institute of Brain and Psychological Sciences, Sichuan Normal University, Chengdu, Sichuan 610060, China.

<sup>3</sup>Department of Psychological and Brain Sciences, Indiana University, Bloomington, IN 47405, USA

<sup>4</sup>Department of Pathology, University of Rochester School of Medicine and Dentistry, Rochester, NY 14642, USA

<sup>5</sup>Center for Neuroscience Research, Children's National Research Institute, Children's National Hospital, Washington DC 20010, USA.

<sup>6</sup>George Washington University, Washington DC 20052, USA.

<sup>7</sup>Department of Physiology and Biophysics, Case Western Reserve University School of Medicine, Cleveland, OH 44106, USA

<sup>8</sup>Department of Anatomy, Physiology, and Pharmacology, University of Saskatchewan, Saskatoon, SK S7N 5E5.

<sup>9</sup>George Washington University School of Medicine and Health Sciences, Washington DC 20052, USA.

<sup>10</sup>Lead Contact

\*Correspondence should be addressed to Dr. Nathan Anthony Smith,  
Email: [nasmith2@childrensnational.org](mailto:nasmith2@childrensnational.org), Twitter: @SmithLab2018

## ABSTRACT

Cumulative data point to a key role of  $\text{Ca}^{2+}$ -dependent gliotransmitter release as a modulator of neuronal networks. Here, we tested the hypothesis that astrocytes in response to agonist exposure also release lipid modulators through  $\text{Ca}^{2+}$ -independent phospholipase  $A_2$  (iPLA<sub>2</sub>) activity. We found that cultured rat astrocytes in response to agonist exposure, released Arachidonic Acid (AA) and/or its derivatives, including the endogenous cannabinoid, 2-arachidonoyl-sn-glycerol (2AG) and the prostaglandin PGE<sub>2</sub>. Surprisingly, buffering of cytosolic  $\text{Ca}^{2+}$  was linked to a sharp increase in astrocytic lipid release. In addition, astrocytic release of PGE<sub>2</sub> enhanced mEPSPs by inhibiting the opening of neuronal Kv channels in acute brain slices. This study provides the first evidence for the existence of a  $\text{Ca}^{2+}$ -independent pathway for the release of PGE<sub>2</sub> from astrocytes and furthermore demonstrates a functional role for astrocytic lipid release in the modulation of synaptic activity.

## INTRODUCTION

Comprising the majority weight of the adult brain, lipids are an essential component of the phospholipid bilayer and, of that, a large percentage are in the form of long chain polyunsaturated fatty acids (PUFA), mainly Arachidonic Acid (AA) and Docosahexaenoic Acid (DHA) (Sinclair, 1975). The liver is the major organ in the body for synthesis of AA, but the brain is also capable of producing AA and DHA from their precursor fatty acids, linoleic and linolenic acids (Dhopeswarkar and Subramanian, 1976). Astrocytes play a pivotal role in this process. Through their vascular endfeet, astrocytes have prime access to incoming fatty acid precursors as they cross the blood brain barrier (BBB) and serve as the major site for processing essential fatty acids in the CNS (Moore, 1993). Astrocytes also play a key role in macroscopic distribution of lipids via perivascular glymphatic fluxes (Rangroo Thrane et al., 2013a; Plog and Nedergaard, 2018).

Lipids have gained much attention for their role as bioactive mediators in the CNS (Carta et al., 2014; Ledo et al., 2019). Numerous studies have focused on lipids in both functional hyperemia and synaptic activity. For instance, PGE<sub>2</sub> has been shown to be a potent vasodilator and vasoconstrictor in CNS blood flow regulation (Zonta et al., 2003; Takano et al., 2006; Gordon et al., 2007; Dabertrand et al., 2013; MacVicar and Newman, 2015; Czigler et al., 2019), as well as a regulator of membrane excitability in CA1 pyramidal neurons during synaptic activity (Chen and Bazan, 2005). Furthermore, AA and its derivatives are important secondary messengers that can modulate the activity of a variety of ion channels (Piomelli, 1993; Meves, 1994; Horimoto et al., 1997; Boland and Drzewiecki, 2008; Cordero-Morales and Vasquez, 2018). For example, the endocannabinoid, 2AG can suppress neurotransmitter release from the presynaptic membrane through the activation of cannabinoid receptor 1 (CB1) (Fride, 2002; Hashimoto et al., 2007; Smith et al., 2019). In addition, PGE<sub>2</sub> has been shown to suppress Kv current in sensory neurons (Nicol et al., 1997; Evans et al., 1999), whereas AA suppresses Kv channels in the soma or dendrites of pyramidal neurons, and therefore, broadens presynaptic action potentials (Carta et al., 2014) and enhances EPSPs (Ramakers and Storm, 2002). However, these studies focused

on neuronal lipid release effects on synaptic activity and paid little or no attention to the fact that astrocytic lipid mediators via receptor-mediated pathways may also influence synaptic activity. Given that the majority of AA, DHA, and other lipids present in the extracellular fluid are produced by astrocytes (Moore et al., 1991), it is crucial to establish whether astrocytic lipid release actively modulates synaptic activity.

In culture, astrocytes can release AA in a cPLA<sub>2</sub> Ca<sup>2+</sup>-dependent pathway upon activation of metabotropic glutamate and P2Y purine receptors (Bruner and Murphy, 1990; Stella et al., 1994; Stella et al., 1997; Chen and Chen, 1998). In addition, astrocytes also express the Ca<sup>2+</sup>-independent PLA<sub>2</sub> (iPLA<sub>2</sub>) (Sun et al., 2005). This PLA<sub>2</sub> isoform, like cPLA<sub>2</sub>, is activated by the G-protein βγ subunit (iPLA<sub>2</sub>) (Jelsema and Axelrod, 1987; Murayama et al., 1990; van Tol-Steeye et al., 1999), but does not require Ca<sup>2+</sup> or PKC phosphorylation for activation (Winstead et al., 2000). iPLA<sub>2</sub> has also been shown to release AA and DHA upon receptor stimulation in numerous cell types (Gross et al., 1993; Portilla et al., 1994; Akiba et al., 1998; Seegers et al., 2002; Tay and Melendez, 2004). However, to our knowledge, the role of iPLA<sub>2</sub> has yet to be fully explored in astrocytes.

Previous work in our lab and many others had demonstrated that astrocytes are capable of releasing gliotransmitters upon agonist stimulation. However, the question of whether astrocytes play a significant role in modulating synaptic activity is still controversial. Recent studies with genetically encoded calcium indicators enabled us to identify localized Ca<sup>2+</sup> signals within fine processes, and have confirmed Ca<sup>2+</sup>-dependent astrocytic effects on synaptic activity (Yu et al., 2018). However, the existence of Ca<sup>2+</sup>-independent lipid signaling in astrocytes is still not clear. In this study, we assessed the existence of Ca<sup>2+</sup>-independent lipid signaling in astrocytes and asked whether astrocytic lipid release can modulate synaptic transmission. Our analysis showed that upon Ca<sup>2+</sup> chelation and receptor stimulation astrocytes can release lipids through iPLA<sub>2</sub> activation and that these lipids potentiate synaptic activity. These observations expand our understanding of how astrocytes can shape rapid synaptic events.

## **MATERIALS and METHODS**

### **Culture**

Cultured neocortical astrocytes were prepared from 1 to 2 day old Wistar rat pups (Taconic Farms, Inc.) of either sex as previously described (Lin et al., 1998). Briefly, cerebral cortices were dissected, and meninges were removed. The tissue was washed 3 times in Hanks' balanced salt solution without  $\text{Ca}^{2+}$ . Once washed the tissue was triturated, filtered through 70  $\mu\text{m}$  nylon mesh and then centrifuged. The pellet was resuspended in 10 % FBS in DMEM/F12 containing 100 IU  $\text{ml}^{-1}$  penicillin and 100  $\mu\text{g ml}^{-1}$  streptomycin, and transferred to culture flasks. Cells were maintained at 37°C in an incubator containing humidified air and 5%  $\text{CO}_2$ . Medium was changed after 24 hrs and twice a week thereafter. More than 95% of the cells stained positive for GFAP. When the cells became confluent, they were rinsed two times in Hanks' balanced salt solution without  $\text{Ca}^{2+}$ , suspended in 0.05 % trypsin-containing solution for 1 min, resuspended in DMEM/F12, centrifuged to remove trypsin, and then plated in 24-well plates. Experiments were performed when the cells were 95% confluent.

### **Viral Vectors and Viral Transductions**

Viral vectors driving GFAP cyto-GCaMP6f (Baljit S. Khakh) were obtained from the University of Pennsylvania Vector Core (AAV 2/5 serotype). Secondary rat astrocytic cultures were transduced with AAV GFAP cyto-GCaMP6f. After transduction, the cells were allowed to incubate at 37°C for 5 days prior to  $\text{Ca}^{2+}$  imaging experiments.

### **$\text{Ca}^{2+}$ imaging**

Cultured cells in 24-well plates were transduced with AAV GFAP cyto-GCaMP6f and incubated with various pharmacological agents for 30 minutes at 37°C. Using confocal microscopy (Olympus FV500), calcium wave activity was evoked by adding equal volume of medium containing 100 $\mu\text{M}$  of ATP to each well. Relative increases in fluorescence signal evoked by agonist exposure over baseline fluoresce ( $\Delta\text{F}/\text{F}$ ) were calculated as previously described (Nedergaard, 1994; Smith et al., 2018).

## **Radiolabeling and Assessment of AA Release**

Confluent rat astrocytic cultures were incubated with 100nCi <sup>3</sup>H-AA overnight prior to experiments. The cells were washed three times with serum-free medium. After washes, the cells were allowed to recover for 20 minutes. Before stimulation with 100 μM of ATP, the cells were incubated with appropriate inhibitors for 10 to 12 minutes. Aliquots of medium were taken 15 minutes after stimulation and <sup>3</sup>H-AA and/or its derivatives were measured by liquid scintillation counting.

## **HPLC/MS/MS analysis of lipids**

Confluent rat astrocytes were washed with serum-free media and then allowed to recover for 1 hr in serum-free media. At this time cells were either incubated with vehicle or 20 μM CPA for 15 minutes and then challenged with 100 μM of ATP or vehicle for 15 minutes in the same protocol as the above radiolabeled experiments. Media was then removed and retained, 2 ml of HPLC-grade methanol was added to the flask for 5 minutes, removed and retained. An additional 2 ml of HPLC-grade methanol was added, cells were scraped and then this mixture was added to the previously two retained fractions. 200 pM deuterium-labeled standards were added, then samples were centrifuged at 19,000 x g in 24C. Lipids in the eluent were partially purified on 500mg C18 Bond Elut solid phase extraction columns (Varian), concentrated into methanolic fractions of 40%, 60%, 85%, and 100%, then analyzed using HPLC/MS/MS (Shimadzu SCL10Avp-Wilmington, DE, USA; API 3000 Applied Biosystems/MDS SCIEX, Foster city, CA, USA) as previously described (Leishman et al., 2018). Over 50 lipids were targeted in these screens including 40 lipoamines, 3 acyl glycerols, 2 free fatty acids, and 2 prostaglandins. It was determined in pilot studies that the signal detection of lipids in the media was too low for analysis of media alone; however, the signal with both the media and cells was more than sufficient to perform a large-scale analysis; therefore, the media and the cells were combined before the lipid extraction as outlined above.

## **PGE<sub>2</sub> Release Assessment via PGE<sub>2</sub> Immunoassay**

Confluent rat astrocytic cultures were washed 3 times with serum-free medium. After washes, the cells were allowed to recover for 20 minutes. Before stimulation with 100 μM of ATP, the cells

were incubated with appropriate inhibitors for 10 to 12 minutes. Aliquots of medium were taken 15 minutes after stimulation and measured using a PGE<sub>2</sub> Enzyme Immunoassay Kit from Cayman Chemicals following the manufacturer's manual.

### **Western Blot**

Samples harvested from 24-well plates were separated by SDS-PAGE and transferred to nitrocellulose. Membranes were blocked with Tris-buffered saline containing 0.05% (wt/vol) Tween 20 and 5% nonfat dry milk. The primary antibodies were anti-iPLA2 (Sigma, St. Louis, MO), anti-β-actin (Cell Signaling, Danvers, MA), at 1:1000 to 1:2000 dilutions in blocking buffer. Detection of chemiluminescence from horseradish peroxidase-linked secondary antibodies was performed using the ChemiDoc™ XRS+ System and running Image Lab™ software.

### **Isolation of human fetal astrocytes**

Human fetal forebrain tissues were obtained from second-trimester aborted fetuses of 20 weeks gestational age. Tissues were obtained from aborted fetuses, with informed consent and tissue donation approval from the mothers, under protocols approved by the Research Subjects Review Board of the University of Rochester Medical Center. No patient identifiers were made available to or known by the investigators; no known karyotypic abnormalities were included. The forebrain tissue samples were collected and washed 2-3 times with sterile Hank's balanced salt solution with Ca<sup>2+</sup>/Mg<sup>2+</sup> (HBSS<sup>+/+</sup>). The cortical plate region (CTX) of fetal forebrain was dissected and separated from the ventricular zone/subventricular zone (VZ/SVZ) portion. The CTX was then dissociated with papain as previously described (Keyoung et al., 2001). The cells were resuspended at 2-4 x 10<sup>6</sup> cells/ml in DMEM/F12 supplemented with N2, 0.5 % FBS and 10 ng/ml bFGF and plated in suspension culture dishes. The day after dissociation, cortical cells were recovered and subjected to magnetic activated cell sorting (MACS) for purification of the astrocyte progenitor population. Briefly, the recovered cells were incubated with CD44 microbeads as per the manufacturer's recommendations (Miltenyi Biotech). The cells were then washed, resuspended in Miltenyi Washing buffer and bound to a magnetic column (Miltenyi Biotech). The

bound CD44<sup>+</sup> astrocyte progenitor cells were eluted, collected and then washed with DMEM/F12. The purified human fetal astrocyte progenitors were cultured in DMEM/F12 supplemented with N2 and 5% characterized FBS to further differentiate them. To prepare culture dishes for PGE2 immunoassays or immunocytochemistry, the fetal cortical astrocytes were dissociated with TrypLE (Invitrogen) into single cells and then plated onto poly-L-ornithine/laminin coated 24-well plates (50,000 cells per well).

### **shRNA Lentiviral knockdown of iPLA<sub>2</sub> in astrocytes**

Rat astrocytes cultures were plated in a 24-well plate and grown to approximately 50% confluency. According to the manufacturer's instructions with modifications, the cultures were transduced overnight by adding either group VI iPLA<sub>2</sub> shRNA (r) lentiviral particles (sc-270117-V) or control shRNA lentiviral particles-A (sc-108080) directly to the culture medium containing polybrene (sc-134220) (all from Santa Cruz Biotechnology, Santa Cruz). 24 hrs after transfection, the culture medium was removed and fresh culture medium without polybrene was added. Experiments and western blot analysis were performed 7 days after transduction.

### **Acute Hippocampal Slice preparation and Electrophysiology**

Unless otherwise noted, 15-21 day old C57BL/6 (Charles River, Wilmington, MA), MrgA1<sup>+/-</sup> transgenic, and littermate control MrgA1<sup>-/-</sup> pups (courtesy of Dr. Ken McCarthy) (Fiacco et al., 2007) of either sex were used for preparation of hippocampal slices as previously described (Wang et al., 2012). The pups were anesthetized in a closed chamber with isoflurane (1.5%), and decapitated. The brains were rapidly removed and immersed in ice-cold cutting solution that contained (in mM): 230 sucrose, 2.5 KCl, 0.5 CaCl<sub>2</sub>, 10 MgCl<sub>2</sub>, 26 NaHCO<sub>3</sub>, 1.25 NaH<sub>2</sub>PO<sub>4</sub>, and 10 glucose, pH=7.2-7.4. Coronal slices (400 μm) were cut using a vibratome (Vibratome Company, St. Louis) and transferred to oxygenated artificial cerebrospinal fluid (aCSF) that contained (in mM): 126 NaCl, 4 KCl, 2 CaCl<sub>2</sub>, 1 MgCl<sub>2</sub>, 26 NaHCO<sub>3</sub>, 1.25 NaH<sub>2</sub>PO<sub>4</sub>, and 10 glucose, pH = 7.2-7.4, osmolarity = 310 mOsm. Slices were incubated in aCSF for 1-5 hours at room temperature before recording. Experiments were performed at room temperature (21-23



°C). During the recordings, the slices were placed in a perfusion chamber and superfused with aCSF gassed with 5% CO<sub>2</sub> and 95% O<sub>2</sub> at room temperature. Cells were visualized with a 40X water-immersion objective and differential interference contrast (DIC) optics (BX51 upright microscope, Olympus Optical, New York, NY). Patch electrodes were fabricated from filament thin-wall glass (World Precision Instruments) on a vertical puller; resistance of the pipette is around 6-9 MΩ with intracellular pipette solution added. I-V curves of voltage-gated potassium currents were recorded under voltage-clamp using an AxoPatch MultiClamp 700B amplifier (Axon Instruments, Foster City, CA). The pipette solution contained (in mM) 140 K-gluconate, 5 Na-phosphocreatine, 2 MgCl<sub>2</sub>, 10 HEPES, 4 Mg-ATP, 0.3 Na-GTP (pH adjusted to 7.2 with KOH). When measuring outward currents, QX314 (0.5 mM) was added to the pipette solution to block Na<sup>+</sup> currents. For recordings of miniature EPSPs (mEPSPs) 0.5 μM TTX was added in the aCSF. The junction potential between the patch pipette and bath solution was zeroed before forming a giga-seal. Patches with seal resistances of less than 1 GΩ were rejected. Data were low-pass filtered at 2 kHz and digitized at 10 kHz with a Digidata 1440 interface controlled by pClamp Software (Molecular Devices, Union City, CA).

### **Pharmacological agents used in cultures and slice experiments**

Adenosine 5'-triphosphate (ATP, 100 μM); Cyclopiazonic acid (CPA, 20 μM); *trans*- (1S, 3R)-1-Amino-1, 3-cyclopentanedicarboxylic acid (*t*-ACPD, 100 μM); (±)-α-Amino-3-hydroxy-5-methylisoxazole-4-propionic acid hydrobromide ((±)-AMPA, 100 μM); Prostaglandin E<sub>2</sub> (PGE<sub>2</sub>, 50 μM, Tocris); Phe-Met-Arg-Phe amide (FMRF, 15 μM); Thr-Phe-Leu-Leu-Arg-NH<sub>2</sub> (TFLLR-NH<sub>2</sub>, 30 μM, Tocris); N-Acetyl-Asp-Glu (NAAG, 100 μM); (1*R*, 4*R*, 5*S*, 6*R*)-4-Amino-2-oxabicyclo [3.1.0] hexane-4,6-dicarboxylic acid disodium salt (LY379268, 100 μM, Tocris); Calmidazolium chloride (CMZ, 2 μM, Tocris); Methyl arachidonyl fluorophosphonate (MAFP, 10 μM); Bromoenol lactone (Bel, 10 μM); Arachidonic Acid (AA, 50 μM); *N*-(2,6-Dimethylphenylcarbamoymethyl) triethylammonium chloride (QX314, 1mM, Tocris); 4-(4-,9-Diethoxy-1,3-dihydro-1-oxo-2*H*-benz[*f*]isoindol-2-yl)-*N*-(phenylsulfonyl) benzeneacetamide (GW627368X 3 μM, Tocris); 6-

Isopropoxy-9-xanthone-2-carboxylic acid (AH6809, 10  $\mu$ M, Tocris); *N*-(Piperidin-1-yl)-5-(4-iodophenyl)-1-(2,4-dichlorophenyl)-4-methyl-1*H*-pyrazole-3-carboxamide (AM251, 5  $\mu$ M, Tocris); Tetrodotoxin (TTX, 0.5  $\mu$ M, Tocris); 1,2-Bis(2-aminophenoxy)ethane-*N,N,N',N'*-tetraacetic acid (Bapta, 50  $\mu$ M, Tocris); and 1,2-Bis(2-aminophenoxy)ethane-*N,N,N',N'*-tetra-acetic acid tetrakis (acetoxymethylester) (BAPTA-AM, 20  $\mu$ M). All chemicals were from Sigma unless otherwise noted.

### Statistical analysis of data

Statistical significance was evaluated by one-way ANOVA and Post Hoc Tests (Tukey and Dunn) using Prism software and deemed significant when  $P < 0.05$  for  $^3\text{H-AA}$  and  $\text{PGE}_2$  assay experiments. For electrophysiology experiments, significance was determined by paired or unpaired t-tests or Tukey-Kramer post hoc multiple comparison tests. HPLC/MS/MS lipidomics data were analyzed with ANOVA and Fishers LSD post-hoc using SPSS when  $P < 0.05$  or  $P < 0.10$ . All results are reported as mean  $\pm$  s.e.m.

## RESULTS

### GPCR-mediated $\text{Ca}^{2+}$ -independent release of $^3\text{H-AA}$ and its derivatives from astrocytic cultures

We first assessed the efficiency by which preloading with inhibitor of the endoplasmic reticulum (ER)  $\text{Ca}^{2+}$  pump cyclopiazonic acid (CPA) (20  $\mu$ M) or the cytosolic  $\text{Ca}^{2+}$  chelator 1,2-bis(o-aminophenoxy)ethane-*N,N,N',N'*-tetraacetic acid (acetoxymethyl ester) (BAPTA-AM) (20  $\mu$ M) blocked ATP (100  $\mu$ M) induced cytosolic  $\text{Ca}^{2+}$  in cultured rat astrocytes. Imaging cytosolic  $\text{Ca}^{2+}$  (AAV GFAP cyto-GCaMP6f) showed that the purine agonist ATP (100  $\mu$ M) induced a prompt increase in  $\text{Ca}^{2+}$  that was completely blocked in CPA and BAPTA loaded cultures, whereas 10  $\mu$ M Methylarachidonyl Fluorophosphates (MAFP), a nonspecific inhibitor of both  $\text{cPLA}_2$  and  $\text{iPLA}_2$  or 10  $\mu$ M of Bromoenol Lactone (Bel) (Cornell-Bell et al.), a specific inhibitor of  $\text{iPLA}_2$  did not affect ATP induced  $\text{Ca}^{2+}$  rises in cultures (**Figure 1A-B**).

As a broad-based approach to AA-specific lipidomics, Ca<sup>2+</sup>-independent release of AA and/or its derivatives was performed using a <sup>3</sup>H-AA assay (**Figure 1C**). Cultured rat astrocytes were pre-incubated overnight with <sup>3</sup>H-AA, providing sufficient time for <sup>3</sup>H-AA to be incorporated in multiple biosynthetic and metabolic pathways including membrane phospholipids, which are precursors for endocannabinoids, and related lipids that are themselves precursors to AA release (Chen and Chen, 1998; Strokin et al., 2003). Therefore, this assay serves to determine if any AA derivatives (precursors or metabolites) from the <sup>3</sup>H-AA that was incorporated into the cell are being released and all such lipids species will be referred to hereafter as <sup>3</sup>H-AA labeled metabolites. ATP on its own failed to induce the release of <sup>3</sup>H-AA that was within the level of detection (**Figure 1D**); however, in cultures pretreated for 10 to 12 minutes with CPA or BAPTA-AM, ATP evoked a robust increase in the release of <sup>3</sup>H-AA, whereas CPA alone had no effect (**Figure 1D**). Similarly, we found that upon stimulation with a combination of tACPD (100 μM), an mGluR agonist, and AMPA (100 μM), an ionotropic GluR agonist, we observe a significant release of <sup>3</sup>H-AA when cytosolic calcium was blocked with CPA, but not in cultures not pretreated with CPA (**Figure 1E**). These observations confirm that rat astrocytes can release AA derivatives, key precursors of bioactive eicosanoids (Strokin et al., 2003; Rosenegger et al., 2015), but that AA release is, surprisingly, inhibited by increases in cytosolic Ca<sup>2+</sup>.

#### **iPLA<sub>2</sub> activity is essential for calcium independent liberation of AA-derived lipids.**

To explore the mechanism of Ca<sup>2+</sup>-independent release of <sup>3</sup>H-AA, we next evaluated whether inhibition of the Ca<sup>2+</sup>-sensitive cPLA<sub>2</sub> or alternatively of the Ca<sup>2+</sup>-insensitive iPLA<sub>2</sub> enzymes would reduce <sup>3</sup>H-AA release. Astrocytes were pretreated with 10 μM of MAFP or 10 μM of BEL. MAFP significantly decreased the release of <sup>3</sup>H-AA in response to ATP in cultures exposed to CPA (**Figure 1F**). Similarly, Bel suppressed release of <sup>3</sup>H-AA, thus confirming a role for iPLA<sub>2</sub> in Ca<sup>2+</sup>-independent lipid release (**Figure 1F**). <sup>3</sup>H-AA release was only observed when agonist-induced

increases in cytosolic  $\text{Ca}^{2+}$  were blocked (**Figures 1D-E**), suggesting that intracellular  $\text{Ca}^{2+}$  inhibits the  $\text{Ca}^{2+}$ -independent  $\text{iPLA}_2$ .

Calmodulin is a potent  $\text{Ca}^{2+}$ -dependent inhibitor of  $\text{iPLA}_2$  (Wolf and Gross, 1996). To assess the interaction between calmodulin and  $\text{iPLA}_2$ , the cells were treated with Calmidazolium (CMZ), an inhibitor of  $\text{Ca}^{2+}$ /calmodulin interaction that has been shown to remove the calmodulin block of  $\text{iPLA}_2$  (Wolf and Gross, 1996). In the presence of CMZ (2  $\mu\text{M}$ ), ATP led to a significant release of  $^3\text{H-AA}$ , which was comparable to blocking increases in cytosolic  $\text{Ca}^{2+}$  by preloading with either CPA or BAPTA (**Figure 1E**). This observation suggests that  $\text{Ca}^{2+}$  acts primarily as a brake, through calmodulin, that effectively inhibits  $\text{iPLA}_2$  activity (Wolf and Gross, 1996; Wolf et al., 1997). These findings are consistent with previous studies showing that  $\text{iPLA}_2$  is involved in receptor-mediated AA release in pancreatic islet cells (Gross et al., 1993), smooth muscle cells (Lehman et al., 1993), and endothelial cells (Seegers et al., 2002). Taken together, these data provide evidence of a new signaling mechanism in astrocytes through  $\text{Ca}^{2+}$ -independent  $\text{iPLA}_2$ , which is the major  $\text{PLA}_2$  isoform in the brain and accounting for 70% of total  $\text{PLA}_2$  activity (Yang et al., 1999).

### **Targeted lipidomics reveals multiple lipid species produced in cultured astrocytes through $\text{Ca}^{2+}$ independent mechanisms**

Using lipid extraction and partial purification methods coupled to HPLC/MS/MS, targeted lipidomics screens were performed on cultured astrocytes that were incubated with CPA and then challenged with ATP and compared to vehicle controls. Of the 50 lipids that were screened, 30 were present in each of the samples and could be used for comparative analyses. Table 1 lists all of the actual values as mean  $\pm$ SEM (**Figure 2A**). **Figure 2A** summarizes those with significant differences as well as the magnitude of the differences. Of the 30 lipids detected, 16 increased with ATP in the presence of CPA including AA and  $\text{PGE}_2$ . **Figures 2B-C** are representative chromatograms of the HPLC/MS/MS methods used for detection of  $\text{PGE}_2$ . Notably, 5 of the 8 AA-derivatives were significantly increased, including the endocannabinoids, anandamide and 2-AG,

though the most dramatic increases were of the prostaglandin, PGE<sub>2</sub>. **Figure 2D** shows representative differences in three of the AA-derivatives screened.

### **GPCR-mediated Ca<sup>2+</sup> independent release of PGE<sub>2</sub> from astrocytic cultures**

Given that we and others have previously implicated Ca<sup>2+</sup>-dependent astrocyte lipid release in vasoregulation (Zonta et al., 2003; Takano et al., 2006; Gordon et al., 2008), it was surprising that PGE<sub>2</sub> was released via a Ca<sup>2+</sup>-independent mechanism. Since HPCL/MS/MS methods required large quantities of cells to detect PGE<sub>2</sub>, whereas the PGE<sub>2</sub> ELISA assay accurately can detect PGE<sub>2</sub> release in 24-well cultures, we used ELISA to explore and define the Ca<sup>2+</sup> dependence of astrocytic PGE<sub>2</sub> release. Because iPLA<sub>2</sub> is essential for Ca<sup>2+</sup> independent liberation of AA derived lipids, we first assessed whether knockdown of iPLA<sub>2</sub> via viral transduction would inhibit astrocytic release of PGE<sub>2</sub>. In the presence of CPA (20 μM), ATP (100 μM) failed to induce PGE<sub>2</sub> release in astrocytic cultures viral transduced with shRNA, whereas a significant increase in the release of PGE<sub>2</sub> was observed in the presence of ATP and CPA in control shRNA cultures (**Figure 3A**). Knockdown of iPLA<sub>2</sub> via shRNA viral transduction was confirmed with western blot analysis (**Figure 3B**).

Since cultured astrocytes express mGluR5 (Balazs et al., 1997; Silva et al., 1999; Gebremedhin et al., 2003), we next tested whether tACPD (100 μM) and AMPA (100 μM) in the presence and absence of CPA evoked PGE<sub>2</sub> release. In the absence of CPA, little to no release of PGE<sub>2</sub> was observed (**Figure 3C**). However, when CPA blocked release of internal stores of Ca<sup>2+</sup>, tACPD and AMPA significantly increased PGE<sub>2</sub> release (**Figure 3C**).

The most abundant mGluR receptors expressed by astrocytes are mGluR3 and mGluR5 (Petralia et al., 1996; Aronica et al., 2000; Tamaru et al., 2001). However, mGluR5 is developmentally regulated and is not expressed by astrocytes in the adult brain, whereas mGluR3 is persistently expressed at high levels throughout adulthood (Sun et al., 2013). It is therefore important to know whether activation of mGluR3 can induce Ca<sup>2+</sup>-independent PGE<sub>2</sub> release since activation of this receptor has recently been shown to induce Ca<sup>2+</sup> transients in adult

hippocampal astrocytes (Haustein et al., 2014; Tang et al., 2015). In the presence of CPA, both NAAG and LY379268 (mGluR3 agonists) (Wroblewska et al., 1997; Bond et al., 1999) evoked a significant increase in the release of PGE<sub>2</sub>, whereas the same agonists failed to release PGE<sub>2</sub> in the absence of CPA (**Figure 3D**). This is interesting because it shows that activation of an astrocytic Gi-coupled receptor can release gliotransmitters in a Ca<sup>2+</sup>-independent mechanism.

To extend the observation to human astrocytes, we performed the same experiments in primary cultured astrocytes harvested from embryonic tissue (Windrem et al., 2004; Windrem et al., 2008; Han et al., 2013). After pharmacologically assessing iPLA<sub>2</sub> activity in rat astrocytes (**Figure 1F**), we evaluated iPLA<sub>2</sub> expression in all the culture models. Western blot analysis showed that iPLA<sub>2</sub> expression was not limited to rat astrocytic cultures, but was also readily expressed in both human and mouse astrocytes (**Figure 3E**). In the presence of CPA, ATP evoked a significant PGE<sub>2</sub> release from cultured human astrocytes, whereas little to no release was observed with ATP alone (**Figure 3F**). Likewise, co-application of tACPD and AMPA showed the same effect (**Figure 3F**). Taken together, these findings show that ATP or mGluR3 activation lead to Ca<sup>2+</sup>-independent PGE<sub>2</sub> release and that iPLA<sub>2</sub> is expressed in mouse, rat, and human astrocytic cultures.

### **Ca<sup>2+</sup>-independent astrocytic lipid release enhances mEPSPs via Kv channel blockade**

Experiments thus far have demonstrated that cultured astrocytes in response to agonist exposure can indeed release lipids in a Ca<sup>2+</sup>-independent pathway. In fact, the in vitro analysis showed that agonist-induced Ca<sup>2+</sup> increases impede PGE<sub>2</sub> release as CPA, BAPTA, and CMZ pretreatment potentiated PGE<sub>2</sub> release.

Earlier studies have shown that AA and its metabolite, PGE<sub>2</sub>, inhibit neuronal Kv current (Horimoto et al., 1997; Nicol et al., 1997; Evans et al., 1999) and thereby enhance excitability (Sekiyama et al., 1995; Chen and Bazan, 2005; Sang et al., 2005). We next evaluated whether astrocytic lipid release also inhibits neuronal Kv current and enhances excitability in acute

hippocampal slices. We performed dual patch-clamp recordings of pairs of CA1 pyramidal neurons and astrocytes in acute hippocampal brain slices prepared from 12-18 day old mice (**Figure 4A**). In order to isolate transiently active potassium currents, we used voltage ramps within approximately 100ms, which is fast enough to capture transient A-currents (Phillips et al., 2018). It is worth noting that the I-V ramp is a good way to discern what voltage deflection in outward current the drugs might effect (Jackson and Bean, 2007). We recorded Kv currents in CA1 neurons as an assay for astrocytic lipid release, since Kv currents are sensitive to AA and/or its metabolites (Villarroel and Schwarz, 1996; Carta et al., 2014). Kv currents were isolated by adding 1 mM QX314 in the patch pipette to block sodium channels (Talbot and Sayer, 1996; Kim et al., 2010) and imposing a voltage ramp (from -100 mV to 50 mV) every 5 seconds to continuously monitor changes in Kv channel current (Ji et al., 2000; Rangroo Thrane et al., 2013b; Carta et al., 2014) as an assay for agonist-induced astrocytic lipid release (Figure 4A). As expected, direct puffing of PGE<sub>2</sub> (50 μM) and AA (50 μM) with a micropipette induced changes in Kv current. The Kv current was significantly reduced in the presence of both PGE<sub>2</sub> (50 μM) and AA (50 μM), which is consistent with previous studies (Evans et al., 1999; Carta et al., 2014) (**Figure 4B-C**).

Is astrocytic release of AA and its metabolites sufficient to increase CA1 neuronal excitability? To assess the effects of astrocytic Ca<sup>2+</sup> signaling on neighboring neuronal Kv channels, we first stimulated astrocytes with ATP and TFLLR-NH<sub>2</sub>, an agonist of protease-activated receptor-1 (PAR1) that is primarily expressed by astrocytes (Shigetomi et al., 2008). ATP (100 μM) induced a comparable change to neuronal Kv when BAPTA (50 μM) was present in the astrocyte patch pipette, but not when it was absent (**Figure 4B-C**). A similar transient decrease in Kv current was observed when astrocytes were activated by TFLLR-NH<sub>2</sub> (30μM). Again, the reduction in neuronal Kv currents was only detected when TFLLR was applied when BAPTA was added to the astrocytic pipette solution (**Fig. 4B-C**). To selectively activate astrocytic Ca<sup>2+</sup> signaling, we next employed MrgA1 transgenic animals (MrgA1<sup>+/-</sup>), which express the

exogenous Gq-coupled MRG receptor (MrgA1) under control of the GFAP promoter. The MrgA1 agonist, Phe-Met-Arg-Phe amide (FMRF), mobilizes intracellular astrocytic  $\text{Ca}^{2+}$  stores, enabling assessment of the effects of astrocytic  $\text{Ca}^{2+}$  signaling on neighboring neuronal Kv currents. Although FMRF (15  $\mu\text{M}$ ), induces potent and selective increases in astrocytic cytosolic  $\text{Ca}^{2+}$  in hippocampal slices (Fiacco et al., 2007; Agulhon et al., 2010; Wang et al., 2012), no detectable changes in neuronal Kv current were detected when the pipette used to patch the astrocyte did not contain BAPTA (**Figure 4B-C**). However, when BAPTA was included in the astrocyte patch pipette, a marked decrease in neuronal Kv current was evoked by FMRF exposure (**Figure 4B-C**). Thus, these observations suggest that astrocytes can modulate neuronal Kv current via previously undocumented  $\text{Ca}^{2+}$ -independent lipid release.

To assess whether a decrease in neuronal Kv current is a consequence of  $\text{Ca}^{2+}$ -independent astrocytic lipid release, we next employed specific lipid receptor antagonists for  $\text{PGE}_2$  and endocannabinoids. Since  $\text{PGE}_2$  receptors 1, 2, 3, and 4 are expressed on hippocampal pyramidal neurons (Andreasson, 2010; Maingret et al., 2017), we employed AH6809, a  $\text{PGE}_2$  EP1,2, and 3 antagonist (Abramovitz et al., 2000; Ganesh, 2014), and GW627368, a  $\text{PGE}_2$  EP4 antagonist (Jones and Chan, 2005; Wilson et al., 2006). In the presence of AH6809 (10  $\mu\text{M}$ ) and GW627368X (3  $\mu\text{M}$ ) in the perfusion solution, the TFLLR, FMRF, and ATP  $\text{Ca}^{2+}$ -independent induced decrease in neuronal Kv current was abolished (**Figure 4C**); In contrast, AM251 (5  $\mu\text{M}$ ), a CB1 antagonist, failed to abolish the decrease in Kv current (**Figure 4C**). Taken together, these data suggest that the observed decrease in neuronal Kv current is a result of astrocytic  $\text{Ca}^{2+}$ -independent release of  $\text{PGE}_2$ .

Interestingly, the presence or absence of BAPTA in the astrocytic pipette solution also modulated agonist-induced changes in neuronal membrane potential (**Figure 4D**). Without BAPTA in astrocytes, TFLLR induced hyperpolarization ( $1.4 \pm 0.26$  mV) (**Figure 4D**), as has been shown in a previous study to be due to a decrease in extracellular potassium (Wang et al., 2012).



However, with BAPTA present in astrocytes, TFLLR induced depolarization ( $2.1 \pm 0.25$  mV) (**Figure 4D**), an effect we suggest might be attributable to the blockage of potassium current.

PGE<sub>2</sub> has previously been shown to enhance neuronal mEPSPs (Sekiyama et al., 1995) (Sang et al., 2005). We here found that TFLLR-induced activation of astrocytes in slices triggered a decrease in mEPSPs in the normal hippocampal slices (**Figure 5A**), but induced an increase in the amplitude and frequency of mEPSPs, but only when BAPTA was added to the astrocytic pipette solution (**Figure 5B**). This observation supports the notion that astrocytic Ca<sup>2+</sup>-independent lipid release may function as a signaling mechanism capable of modulating synaptic activity by blocking Kv channels, which in turn may increase the frequency and amplitude of mEPSPs. It is interesting to note that TFLLR has opposing effects on mEPSP amplitude and frequency dependent upon the level of calcium (**Figure 5C-D**); suggesting calcium deletion provides a pathway to PGE<sub>2</sub> enhancement of neuronal excitability.

## DISCUSSION

Lipidomics has the potential to open exciting new avenues within the field of gliotransmission. In the present study, we utilized a series of lipidomics methodologies which showed that Ca<sup>2+</sup> chelation followed by glutamatergic or purinergic receptor stimulation produces a variety of lipids in astrocytes and drives the release of astrocytic PGE<sub>2</sub>, which serves to modulate neuronal Kv channels resulting in enhanced synaptic activity detected as an increase in mEPSPs (**Figure 5**). Multiple lines of evidence presented here also support the hypothesis that this agonist-induced Ca<sup>2+</sup>-independent lipid release in astrocytes is iPLA<sub>2</sub> dependent. In addition, we demonstrated that receptor mediated Ca<sup>2+</sup>-independent PGE<sub>2</sub> release was preserved across rat and human astrocytes (**Figure 3**). The observations reported here represent, to our knowledge, the first demonstration of Ca<sup>2+</sup>-independent release of gliotransmitters in the form of lipid mediators and adds a novel dimension to our understanding of glial-neuronal communication.

*Importance of iPLA<sub>2</sub> pathway in Ca<sup>2+</sup>-independent astrocytic lipid production*

To date, many studies have shown the multifaceted functions of PLA<sub>2</sub> in the CNS, but iPLA<sub>2</sub> is the major PLA<sub>2</sub> isoform, and accounts for 70% of the PLA<sub>2</sub> activity in the rat brain (Yang et al., 1999). Although the effects of cPLA<sub>2</sub> activation is best documented (Malaplate-Armand et al., 2006; Schaeffer and Gattaz, 2007; Kim et al., 2008), iPLA<sub>2</sub> has also been shown to participate in phospholipid remodeling (Sun et al., 2004), regulate hippocampal AMPA receptors and learning and memory (Menard et al., 2005), regulate store-operated Ca<sup>2+</sup> entry in cerebellar astrocytes (Singaravelu et al., 2006), and provide neuroprotection against oxygen glucose deprivation (Strokin et al., 2006). Astrocytes express both isoforms of PLA<sub>2</sub> (Sun et al., 2005). Numerous studies have documented that PLA<sub>2</sub> is activated in response to agonist induced Ca<sup>2+</sup> signaling and mediates release of AA and/or its metabolites from astrocytes (Bruner and Murphy, 1990; Stella et al., 1994; Stella et al., 1997; Chen and Chen, 1998). Here, we focused on the largely unexplored iPLA<sub>2</sub> lipid pathway in astrocytes. Given the ubiquitous expression of iPLA<sub>2</sub> in astrocytes throughout the brain, the argument can be made that it may have multiple signaling roles. Data presented here provide strong evidence for iPLA<sub>2</sub> in agonist-induced Ca<sup>2+</sup>-independent astrocyte lipid release (**Figure 6**).

*Rapid signaling may be the key to astrocytic release of PGE<sub>2</sub> that modulates neuronal Kv channels*

An important aspect of astrocytic gliotransmitter release is timing. Agonist-induced astrocytic Ca<sup>2+</sup> increases occur on a slow time scale of seconds (Cornell-Bell et al., 1990; Wang et al., 2006; Srinivasan et al., 2015) and Ca<sup>2+</sup> is a key step in gliotransmitter release, (Parpura et al., 1994; Bezzi et al., 1998; Kang et al., 1998), such as ATP (Coco et al., 2003; Parpura and Zorec, 2010; Illes et al., 2019) and D-Serine (Mothet et al., 2000; Yang et al., 2003; Li et al., 2018; Neame et al., 2019). Recently, we have shown that agonist-induced astrocytic Ca<sup>2+</sup> signaling could modulate synaptic activity by active K<sup>+</sup> uptake resulting in a transient lowering of extracellular K<sup>+</sup> and depression of synaptic activity (Wang et al., 2012). More recently, we

demonstrated that astrocytes can modulate a rapid form of synaptic activity ( $\geq 500$ ms) via 2AG release upon mGluR 3 receptor stimulation (Smith et al., 2019). Because receptor mediated astrocytic  $\text{Ca}^{2+}$  drives  $\text{K}^+$  uptake and release of gliotransmitters, these processes must, therefore, occur over a relatively prolonged time course ( $>500$ ms). However, agonist-induced  $\text{Ca}^{2+}$ -independent iPLA<sub>2</sub> lipid release, does not require mobilization of intracellular  $\text{Ca}^{2+}$  stores and this signaling pathway has the potential to signal on a much faster time scale (possibly 10s of milliseconds). We speculate that iPLA<sub>2</sub> mediated lipid release may act as a feedback system that enhances fast synaptic transmission in the immediate short-term or under minimal activity conditions with subsequent activity-mediated calcium increases serving as a brake to the calmodulin-dependent inhibition of iPLA<sub>2</sub>. The slower  $\text{Ca}^{2+}$ -dependent release of gliotransmitters and  $\text{K}^+$  uptake is more suited toward the slow and widespread modulation of brain activity (typically inhibition) that occurs in the setting of, for example, activation of locus coeruleus and associated norepinephrine release (Bekar et al., 2008; Ding et al., 2013).

Voltage-gated potassium channels are located on the dendrites of hippocampal pyramidal neurons (Johnston et al., 2000), and these channels play a major role in controlling dendritic excitability by modulating the amplitude of mEPSPs. A morphological study found that the density of Kv channels in the dendrites of pyramidal neurons increased 5-fold from the soma to the most distal point measured in the apical dendrites (Hoffman et al., 1997). Closure of voltage-gated  $\text{K}^+$  currents will enhance EPSPs, possibly explaining why PGE<sub>2</sub> enhances synaptic transmission and LTP (Sang et al., 2005).

#### *Lipidomics models as a guide for future gliotransmitter discoveries*

Lipidomics is one of the fastest-growing branches of the metabolomics fields with a potential to identify and characterize thousands of lipid species throughout the body, especially in the brain, where the total mass of the structure is made primarily of lipids (Sinclair, 1975). The surface to volume index of astrocytes is larger than most other cell types based on complex fine

structure of laminate, fine astrocytic processes: It is logical that many gliotransmitters would also be lipids. HPLC/MS/MS lipidomics techniques have provided a means to identify specific lipid species with an accuracy that eluded former techniques; however, many of those previously used techniques such as radio-labeled fatty acids and ELISAs are still powerful tools in the field. Here, we have used a combination of these techniques to critically test the hypothesis that lipids are produced in and released from astrocytes in a  $\text{Ca}^{2+}$ -independent manner. Our focus here was on the release of  $\text{PGE}_2$ ; however, there were 15 additional lipids identified that were upregulated under the same conditions. It is also important to note, that of the 30 lipids detected in this small, targeted HPLC/MS/MS assay, 14 did not change supporting the specificity of GPCR stimulated,  $\text{Ca}^{2+}$ -independent lipid production. Interestingly, 2 of the lipids released in response to agonist exposure, *N*-arachidonyl taurine and *N*-palmitoyl tyrosine, were recently shown to activate TRPV4 (Raboune et al., 2014). Emerging evidence suggests a role for a TRPV4/AQP4 complex in regulation of hypo-osmotic stress in astrocytes (Benfenati et al., 2011). The lipidomics data provided here can provide unbiased insight into other signaling mechanisms that involve astrocytic-derived lipid modulators (**Figure 2**).

In conclusion,  $\text{Ca}^{2+}$ -independent astrocytic lipid release constitutes a largely unexplored participant in complex neuro-glia signaling interactions. The analysis presented here adds a new dimension to agonist-induced  $\text{Ca}^{2+}$  signaling by demonstrating that several Gq and Gi-linked receptors can mediate release of lipid modulators and that increases in cytosolic  $\text{Ca}^{2+}$  acts as a break that prevents  $\text{PGE}_2$  release.

#### Author contributions:

F.W., H.B.B., and N.A.S. performed the experiments. F.W., H.B.B., J.X., and N.A.S. analyzed data. S.P. and B.J. performed Western Blots. S.G. and B.L. made cultures. L.B. and N.A.S. planned the experiments. D.C.M. provided Human Astrocytes. F.W., H.B.B., and N.A.S. wrote the paper.

#### Acknowledgments:

We thank Dr. Ken McCarthy for generously sharing transgenic mice. This work was supported by National Institutes of Health Grant K01NS110981 and NSF1926781 to N.A.S. We thank Vittorio Gallo, Stefano Vicini, Alexander S. Thrane, Vinita Rangroo Thrane, Takahiro Takano,

and Fernando R. Fernandez for comments and critical discussion for this manuscript. The authors declare no competing financial interest.

## Figure Legends

### Figure 1: GPCR-mediated $\text{Ca}^{2+}$ independent release of $^3\text{H-AA}$ and/ or its metabolites from astrocytic cultures.

A.) Cultured astrocytes were transduced with AAV GFAP cyto-GCaMP6f and the fluorescent changes associated with intracellular  $\text{Ca}^{2+}$  measured using confocal microscopy. B.) Representative individual traces of GCaMP6f fluorescence changes ( $\Delta F/F_0$ ) in response to ATP stimulation (upper panel). BAPTA-AM (20  $\mu\text{M}$ , n=5 wells) and CPA (20  $\mu\text{M}$ , n=5 wells) eliminated the ATP (100  $\mu\text{M}$ , n=5 wells) evoked  $\text{Ca}^{2+}$  increases in fluorescent. MAFP (10 $\mu\text{M}$ , n=5 wells), Bel (10 $\mu\text{M}$ , n=5 wells) did not inhibit ATP (100  $\mu\text{M}$ ) induced  $\text{Ca}^{2+}$  rises in Astrocytes. \*\*\* $P \leq 0.0001$ , Tukey post-test (lower panel). C.) Schematic of the  $^3\text{H-AA}$  Radioactive Assay. D.) The effects of ATP (100  $\mu\text{M}$ , n=45 wells), CPA (20  $\mu\text{M}$ , n=9 wells), ATP/CPA (n=44 wells), and ATP/BAPTA-AM (n=24 wells) on  $\text{Ca}^{2+}$  independent release of  $^3\text{H-AA}$  and its derivatives in astrocytic cultures compared to control and each other. \*\*\* $P \leq 0.0001$ ; \*\* $P \leq 0.001$ ; \* $P \leq 0.05$ , Tukey post-test. E.) The effects of mGluR agonists tACPD/AMPA (100  $\mu\text{M}$ , n=7), tACPD/AMPA/CPA (n=7 wells), and ATP/CPA (n=7 wells) on  $\text{Ca}^{2+}$ -independent release of  $^3\text{H-AA}$  and its derivatives in astrocytic cultures compared to control and each other. \*\*\* $P \leq 0.0001$ ; \*\* $P \leq 0.001$ ; \* $P \leq 0.05$ , Tukey post-test. F.) Effects of the iPLA<sub>2</sub> inhibitor, BEL (10  $\mu\text{M}$ , n=12 wells), cPLA<sub>2</sub> inhibitor, MAFP (10  $\mu\text{M}$ , n=12 wells), or Calmodulin/ $\text{Ca}^{2+}$  complex inhibitor, CMZ (2  $\mu\text{M}$ , n=20 wells) on  $\text{Ca}^{2+}$  independent release of  $^3\text{H-AA}$  and its derivatives in astrocytic cultures compared to ATP. \*\*\* $P \leq 0.0001$ ; \*\* $P \leq 0.001$ , Tukey post-test. All bar graphs show means  $\pm$  s.e.m.

### Figure 2. Targeted lipidomics of rat astrocytic cultures using HPLC/MS/MS.

A.) Summary of the significant differences and the magnitude of change between the vehicle controls and the CPA/ATP stimulated cells for the 30 lipids in the screen that were detected across samples. Dark green denotes those significant differences that were  $p \leq 0.05$ ; light green denotes those significant differences between  $p \leq 0.10$  and 0.05. No

differences are signified by “*n.d.*”. Arrows indicate the magnitude of effect as indicated in the legend. *Raw data and statistical analyses for all lipids detected are shown in Table 1.* B.) Example chromatograph of a 1pmol of PGE<sub>2</sub> standard as analyzed by the HPLC/MS/MS method optimized for this standard in negative ion mode. C.) Example of an analysis of a partially purified astrocytic extract using the HPLC/MS/MS method that is optimized for PGE<sub>2</sub>. D.) Differences in astrocytic production of the three AA derivative, PGE<sub>2</sub>, Anandamide (AEA), and 2-arachidonoyl glycerol (2-AG) expressed as the average of the moles/sample; vehicle n=3 flask, CPA/ATP n=4 flask.

**Figure 3: GPCR-mediated Ca<sup>2+</sup> independent release of PGE<sub>2</sub> from astrocytic cultures.**

A.) The effects of GPCR agonist ATP (100 μM, n=4 wells) and ATP/CPA (n=4 wells) on Ca<sup>2+</sup> independent PGE<sub>2</sub> release in rat astrocytic cultures virally transduced with shRNA to knockdown iPLA<sub>2</sub> compared to control shRNA cultures. \*P≤0.05, Dunn post-test. B.) Western blot analysis of iPLA<sub>2</sub> knockdown via shRNA. β-actin specific antibody was used to standardize for equal protein loading. C.) The effects of GPCR agonists ATP (100 μM, n=12 wells), tACPD/AMPA (100μM, n=7 wells), tACPD/AMPA/CPA (n=7), and ATP/CPA (n=12 wells) on Ca<sup>2+</sup>-independent PGE<sub>2</sub> release in rat astrocytic cultures compared to control. \*\*\*\*P≤0.0001; \*\*\*P≤0.001, Tukey post-test. D.) The effects of mGluR3 agonist NAAG (100 μM, n=4 wells), LY379268 (100 μM, n=4 wells), NAAG/CPA (n=4), and LY379268/CPA (n=4 wells) on Ca<sup>2+</sup>-independent PGE<sub>2</sub> release in rat astrocytic cultures compared to control and each other. \*\*\*P≤0.001, Tukey post-test. E.) Western blot analysis of iPLA<sub>2</sub> protein for Human, Rat, and Mouse cultures. β-actin specific antibody was used to standardize for equal protein loading. F.) The effects of GPCR agonists ATP (100 μM, n=8 wells), tACPD/AMPA (100 μM, n=8 wells), tACPD/AMPA/CPA (n=8 wells), and ATP/CPA (n=8 wells) on Ca<sup>2+</sup>-independent PGE<sub>2</sub> release in human astrocytic cultures compared

to control and each other. \*\*\* $P \leq 0.0001$ ; \*\* $P \leq 0.001$ ; \* $P \leq 0.05$ , Tukey post-test. All bar graphs show means  $\pm$  s.e.m.

**Figure 4:  $\text{Ca}^{2+}$ -independent astrocytic lipid release inhibits Kv channel blockade.**

A.) Schematic of a patched astrocyte and neuron. B.) Typical traces show application of AA (50  $\mu\text{M}$ ) decreased Kv current. PGE2 (50  $\mu\text{M}$ ) decreased Kv current. TFLLR (30  $\mu\text{M}$ ) with BAPTA also decreased Kv current, as can be seen in the peak currents. FMRF (15  $\mu\text{M}$ ) in the  $\text{MrgA1}^{+/-}$  mice with BAPTA decreased Kv current, but not in the absence of BAPTA. Left traces are an extension of typical recordings before and after application of the agonists in left traces. C.) Quantification of effects of different drugs on the holding voltage ramp induced voltage gated  $\text{K}^+$  currents (\*,  $P < 0.05$ , \*\*,  $p < 0.01$ ,  $n = 5-7$  mice). D.) Typical traces show the membrane potentials changes with the agonists, and quantification was shown in inset (\*\*,  $p < 0.01$ , t-test,  $n = 5-6$  mice). All bar graphs show means  $\pm$  s.e.m.

**Figure 5:  $\text{Ca}^{2+}$ -independent astrocytic lipid release increase mEPSPs.**

A.) Typical trace show that TFLLR (30  $\mu\text{M}$ ) hyperpolarized the neuron and inhibited the mEPSP in normal hippocampal slices. B.) TFLLR (30  $\mu\text{M}$ ) depolarized the neurons and increased the excitability of neurons with BAPTA present in neighbor astrocytes. Lower traces are extensions of parts of recordings in upper trace. C.) Cumulative analysis of mEPSPs recorded in B), which shows that the amplitude and frequency are both increased. D.) Statistical analysis of the amplitude and inter-event intervals before and after TFLLR application, with and without BAPTA present (\*\*,  $p < 0.001$ , paired t-test,  $N = 5-7$  mice). All bar graphs show means  $\pm$  s.e.m.

**Figure 6: GPCR-mediated  $\text{Ca}^{2+}$  independent lipid release in astrocytes.**

A.) Schematic of receptor mediated  $\text{Ca}^{2+}$ -Independent lipid release across the astrocytic membrane. B.) Schematic of receptor mediated  $\text{Ca}^{2+}$ -Dependent lipid release across the astrocytic membrane.



## References

- Abramovitz M, Adam M, Boie Y, Carriere M, Denis D, Godbout C, Lamontagne S, Rochette C, Sawyer N, Tremblay NM, Belley M, Gallant M, Dufresne C, Gareau Y, Ruel R, Juteau H, Labelle M, Ouimet N, Metters KM (2000) The utilization of recombinant prostanoid receptors to determine the affinities and selectivities of prostaglandins and related analogs. *Biochim Biophys Acta* 1483:285-293.
- Agulhon C, Fiacco TA, McCarthy KD (2010) Hippocampal short- and long-term plasticity are not modulated by astrocyte Ca<sup>2+</sup> signaling. *Science* 327:1250-1254.
- Akiba S, Hayama M, Sato T (1998) Inhibition of Ca<sup>2+</sup>-independent phospholipase A<sub>2</sub> by bromoenol lactone attenuates prostaglandin generation induced by interleukin-1 beta and dibutyryl cAMP in rat mesangial cells. *FEBS Lett* 437:225-228.
- Andreasson K (2010) Emerging roles of PGE<sub>2</sub> receptors in models of neurological disease. *Prostaglandins Other Lipid Mediat* 91:104-112.
- Aronica E, van Vliet EA, Mayboroda OA, Troost D, da Silva FH, Gorter JA (2000) Upregulation of metabotropic glutamate receptor subtype mGluR3 and mGluR5 in reactive astrocytes in a rat model of mesial temporal lobe epilepsy. *The European journal of neuroscience* 12:2333-2344.
- Balazs R, Miller S, Romano C, de Vries A, Chun Y, Cotman CW (1997) Metabotropic glutamate receptor mGluR5 in astrocytes: pharmacological properties and agonist regulation. *J Neurochem* 69:151-163.
- Bekar LK, He W, Nedergaard M (2008) Locus coeruleus alpha-adrenergic-mediated activation of cortical astrocytes in vivo. *Cerebral cortex* 18:2789-2795.
- Benfenati V, Caprini M, Dovizio M, Mylonakou MN, Ferroni S, Ottersen OP, Amiry-Moghaddam M (2011) An aquaporin-4/transient receptor potential vanilloid 4 (AQP4/TRPV4) complex is essential for cell-volume control in astrocytes. *Proc Natl Acad Sci U S A* 108:2563-2568.
- Bezzi P, Carmignoto G, Pasti L, Vesce S, Rossi D, Rizzini BL, Pozzan T, Volterra A (1998) Prostaglandins stimulate calcium-dependent glutamate release in astrocytes. *Nature* 391:281-285.
- Boland LM, Drzewiecki MM (2008) Polyunsaturated fatty acid modulation of voltage-gated ion channels. *Cell biochemistry and biophysics* 52:59-84.
- Bond A, Ragumoorthy N, Monn JA, Hicks CA, Ward MA, Lodge D, O'Neill MJ (1999) LY379268, a potent and selective Group II metabotropic glutamate receptor agonist, is neuroprotective in gerbil global, but not focal, cerebral ischaemia. *Neurosci Lett* 273:191-194.
- Bruner G, Murphy S (1990) ATP-evoked arachidonic acid mobilization in astrocytes is via a P<sub>2</sub>Y-purinergic receptor. *J Neurochem* 55:1569-1575.
- Carta M, Lanore F, Rebola N, Szabo Z, Da Silva SV, Lourenco J, Verraes A, Nadler A, Schultz C, Blanchet C, Mulle C (2014) Membrane Lipids Tune Synaptic Transmission by Direct Modulation of Presynaptic Potassium Channels. *Neuron*.
- Chen C, Bazan NG (2005) Endogenous PGE<sub>2</sub> regulates membrane excitability and synaptic transmission in hippocampal CA1 pyramidal neurons. *J Neurophysiol* 93:929-941.
- Chen WC, Chen CC (1998) ATP-induced arachidonic acid release in cultured astrocytes is mediated by G<sub>i</sub> protein coupled P<sub>2</sub>Y<sub>1</sub> and P<sub>2</sub>Y<sub>2</sub> receptors. *Glia* 22:360-370.
- Coco S, Calegari F, Pravettoni E, Pozzi D, Taverna E, Rosa P, Matteoli M, Verderio C (2003) Storage and release of ATP from astrocytes in culture. *J Biol Chem* 278:1354-1362.

- Cordero-Morales JF, Vasquez V (2018) How lipids contribute to ion channel function, a fat perspective on direct and indirect interactions. *Curr Opin Struct Biol* 51:92-98.
- Cornell-Bell AH, Finkbeiner SM, Cooper MS, Smith SJ (1990) Glutamate induces calcium waves in cultured astrocytes: long-range glial signaling. *Science* 247:470-473.
- Czigler A, Toth L, Szarka N, Szilagyi K, Kellermayer Z, Harci A, Vecsernyes M, Ungvari Z, Szolics A, Koller A, Buki A, Toth P (2019) Prostaglandin E2, a postulated mediator of neurovascular coupling, at low concentrations dilates whereas at higher concentrations constricts human cerebral parenchymal arterioles. *Prostaglandins Other Lipid Mediat* 146:106389.
- Dabertrand F, Hannah RM, Pearson JM, Hill-Eubanks DC, Brayden JE, Nelson MT (2013) Prostaglandin E2, a postulated astrocyte-derived neurovascular coupling agent, constricts rather than dilates parenchymal arterioles. *J Cereb Blood Flow Metab* 33:479-482.
- Dhopeswarkar GA, Subramanian C (1976) Biosynthesis of polyunsaturated fatty acids in the developing brain: I. Metabolic transformations of intracranially administered 1-14C linolenic acid. *Lipids* 11:67-71.
- Ding F, O'Donnell J, Thrane AS, Zeppenfeld D, Kang H, Xie L, Wang F, Nedergaard M (2013) alpha-Adrenergic receptors mediate coordinated Ca<sup>2+</sup> signaling of cortical astrocytes in awake, behaving mice. *Cell calcium* 54:387-394.
- Evans AR, Vasko MR, Nicol GD (1999) The cAMP transduction cascade mediates the PGE2-induced inhibition of potassium currents in rat sensory neurones. *J Physiol* 516 ( Pt 1):163-178.
- Fiacco TA, Agulhon C, Taves SR, Petravic J, Casper KB, Dong X, Chen J, McCarthy KD (2007) Selective stimulation of astrocyte calcium in situ does not affect neuronal excitatory synaptic activity. *Neuron* 54:611-626.
- Fride E (2002) Endocannabinoids in the central nervous system--an overview. *Prostaglandins, leukotrienes, and essential fatty acids* 66:221-233.
- Ganesh T (2014) Prostanoid receptor EP2 as a therapeutic target. *J Med Chem* 57:4454-4465.
- Gebremedhin D, Yamaura K, Zhang C, Bylund J, Koehler RC, Harder DR (2003) Metabotropic glutamate receptor activation enhances the activities of two types of Ca<sup>2+</sup>-activated K<sup>+</sup> channels in rat hippocampal astrocytes. *The Journal of neuroscience : the official journal of the Society for Neuroscience* 23:1678-1687.
- Gordon GR, Mulligan SJ, MacVicar BA (2007) Astrocyte control of the cerebrovasculature. *Glia* 55:1214-1221.
- Gordon GR, Choi HB, Rungta RL, Ellis-Davies GC, MacVicar BA (2008) Brain metabolism dictates the polarity of astrocyte control over arterioles. *Nature* 456:745-749.
- Gross RW, Ramanadham S, Kruszka KK, Han X, Turk J (1993) Rat and human pancreatic islet cells contain a calcium ion independent phospholipase A2 activity selective for hydrolysis of arachidonate which is stimulated by adenosine triphosphate and is specifically localized to islet beta-cells. *Biochemistry* 32:327-336.
- Han X, Chen M, Wang F, Windrem M, Wang S, Shanz S, Xu Q, Oberheim NA, Bekar L, Betstadt S, Silva AJ, Takano T, Goldman SA, Nedergaard M (2013) Forebrain engraftment by human glial progenitor cells enhances synaptic plasticity and learning in adult mice. *Cell Stem Cell* 12:342-353.
- Hashimoto-dani Y, Ohno-Shosaku T, Kano M (2007) Endocannabinoids and synaptic function in the CNS. *Neuroscientist* 13:127-137.

- Haustein MD, Kracun S, Lu XH, Shih T, Jackson-Weaver O, Tong X, Xu J, Yang XW, O'Dell TJ, Marvin JS, Ellisman MH, Bushong EA, Looger LL, Khakh BS (2014) Conditions and constraints for astrocyte calcium signaling in the hippocampal mossy fiber pathway. *Neuron* 82:413-429.
- Hoffman DA, Magee JC, Colbert CM, Johnston D (1997) K<sup>+</sup> channel regulation of signal propagation in dendrites of hippocampal pyramidal neurons. *Nature* 387:869-875.
- Horimoto N, Nabekura J, Ogawa T (1997) Arachidonic acid activation of potassium channels in rat visual cortex neurons. *Neuroscience* 77:661-671.
- Illes P, Burnstock G, Tang Y (2019) Astroglia-Derived ATP Modulates CNS Neuronal Circuits. *Trends in neurosciences* 42:885-898.
- Jackson AC, Bean BP (2007) State-dependent enhancement of subthreshold A-type potassium current by 4-aminopyridine in tuberomammillary nucleus neurons. *The Journal of neuroscience : the official journal of the Society for Neuroscience* 27:10785-10796.
- Jelsema CL, Axelrod J (1987) Stimulation of phospholipase A2 activity in bovine rod outer segments by the beta gamma subunits of transducin and its inhibition by the alpha subunit. *Proc Natl Acad Sci U S A* 84:3623-3627.
- Ji J, Salapatek AM, Diamant NE (2000) Inwardly rectifying K(+) channels in esophageal smooth muscle. *Am J Physiol Gastrointest Liver Physiol* 279:G951-960.
- Johnston D, Hoffman DA, Magee JC, Poolos NP, Watanabe S, Colbert CM, Migliore M (2000) Dendritic potassium channels in hippocampal pyramidal neurons. *J Physiol* 525 Pt 1:75-81.
- Jones RL, Chan KM (2005) Investigation of the agonist activity of prostacyclin analogues on prostanoid EP4 receptors using GW 627368 and taprostene: evidence for species differences. *Prostaglandins Leukot Essent Fatty Acids* 72:289-299.
- Kang J, Jiang L, Goldman SA, Nedergaard M (1998) Astrocyte-mediated potentiation of inhibitory synaptic transmission. *Nature neuroscience* 1:683-692.
- Kim DH, Fitzsimmons B, Hefferan MP, Svensson CI, Wancewicz E, Monia BP, Hung G, Butler M, Marsala M, Hua XY, Yaksh TL (2008) Inhibition of spinal cytosolic phospholipase A(2) expression by an antisense oligonucleotide attenuates tissue injury-induced hyperalgesia. *Neuroscience* 154:1077-1087.
- Kim JH, Kushmerick C, von Gersdorff H (2010) Presynaptic resurgent Na<sup>+</sup> currents sculpt the action potential waveform and increase firing reliability at a CNS nerve terminal. *The Journal of neuroscience : the official journal of the Society for Neuroscience* 30:15479-15490.
- Ledo A, Rocha BS, Laranjinha J (2019) Bioactive Lipids and the Gut-Brain Axis: Diet as a Modulator of Bioactivity and Diversity of Lipids in the Brain. *Adv Exp Med Biol* 1127:147-168.
- Lehman JJ, Brown KA, Ramanadham S, Turk J, Gross RW (1993) Arachidonic acid release from aortic smooth muscle cells induced by [Arg8]vasopressin is largely mediated by calcium-independent phospholipase A2. *J Biol Chem* 268:20713-20716.
- Leishman E, Manchanda M, Thelen R, Miller S, Mackie K, Bradshaw HB (2018) Cannabidiol's Upregulation of N-acyl Ethanolamines in the Central Nervous System Requires N-acyl Phosphatidyl Ethanolamine-Specific Phospholipase D. *Cannabis Cannabinoid Res* 3:228-241.

- Li S, Uno Y, Rudolph U, Cobb J, Liu J, Anderson T, Levy D, Balu DT, Coyle JT (2018) Astrocytes in primary cultures express serine racemase, synthesize d-serine and acquire A1 reactive astrocyte features. *Biochem Pharmacol* 151:245-251.
- Lin JH, Weigel H, Cotrina ML, Liu S, Bueno E, Hansen AJ, Hansen TW, Goldman S, Nedergaard M (1998) Gap-junction-mediated propagation and amplification of cell injury. *Nat Neurosci* 1:494-500.
- MacVicar BA, Newman EA (2015) Astrocyte regulation of blood flow in the brain. *Cold Spring Harb Perspect Biol* 7.
- Maingret V, Barthet G, Deforges S, Jiang N, Mulle C, Amedee T (2017) PGE2-EP3 signaling pathway impairs hippocampal presynaptic long-term plasticity in a mouse model of Alzheimer's disease. *Neurobiol Aging* 50:13-24.
- Malaplate-Armand C, Florent-Bechard S, Youssef I, Koziel V, Sponne I, Kriem B, Leininger-Muller B, Olivier JL, Oster T, Pillot T (2006) Soluble oligomers of amyloid-beta peptide induce neuronal apoptosis by activating a cPLA2-dependent sphingomyelinase-ceramide pathway. *Neurobiol Dis* 23:178-189.
- Menard C, Valastro B, Martel MA, Chartier E, Marineau A, Baudry M, Massicotte G (2005) AMPA receptor phosphorylation is selectively regulated by constitutive phospholipase A(2) and 5-lipoxygenase activities. *Hippocampus* 15:370-380.
- Meves H (1994) Modulation of ion channels by arachidonic acid. *Prog Neurobiol* 43:175-186.
- Moore SA (1993) Cerebral endothelium and astrocytes cooperate in supplying docosahexaenoic acid to neurons. *Adv Exp Med Biol* 331:229-233.
- Moore SA, Yoder E, Murphy S, Dutton GR, Spector AA (1991) Astrocytes, not neurons, produce docosahexaenoic acid (22:6 omega-3) and arachidonic acid (20:4 omega-6). *J Neurochem* 56:518-524.
- Mothet J, Parent A, Wolosker H, Jr RB, Linden D, Ferris C, Rogawski M, Snyder S (2000) D-serine is an endogenous ligand for the site of N-methyl D-aspartate receptor. *Proc Natl Acad Sci U S A* 97:4926-4931.
- Murayama T, Kajiyama Y, Nomura Y (1990) Histamine-stimulated and GTP-binding protein-mediated phospholipase A2 activation in rabbit platelets. *J Biol Chem* 265:4290-4295.
- Neame S, Safory H, Radzishewsky I, Touitou A, Marchesani F, Marchetti M, Kellner S, Berlin S, Foltyn VN, Engelender S, Billard JM, Wolosker H (2019) The NMDA receptor activation by d-serine and glycine is controlled by an astrocytic Phgdh-dependent serine shuttle. *Proceedings of the National Academy of Sciences of the United States of America* 116:20736-20742.
- Nedergaard M (1994) Direct signaling from astrocytes to neurons in cultures of mammalian brain cells. *Science* 263:1768-1771.
- Nicol GD, Vasko MR, Evans AR (1997) Prostaglandins suppress an outward potassium current in embryonic rat sensory neurons. *J Neurophysiol* 77:167-176.
- Parpura V, Zorec R (2010) Gliotransmission: Exocytotic release from astrocytes. *Brain Res Rev* 63:83-92.
- Parpura V, Basarsky TA, Liu F, Jeftinija K, Jeftinija S, Haydon PG (1994) Glutamate-mediated astrocyte-neuron signalling. *Nature* 369:744-747.
- Petralia RS, Wang YX, Niedzielski AS, Wenthold RJ (1996) The metabotropic glutamate receptors, mGluR2 and mGluR3, show unique postsynaptic, presynaptic and glial localizations. *Neuroscience* 71:949-976.

- Phillips WS, Del Negro CA, Rekling JC (2018) Dendritic A-Current in Rhythmically Active PreBotzinger Complex Neurons in Organotypic Cultures from Newborn Mice. *The Journal of neuroscience : the official journal of the Society for Neuroscience* 38:3039-3049.
- Piomelli D (1993) Arachidonic acid in cell signaling. *Current opinion in cell biology* 5:274-280.
- Plog BA, Nedergaard M (2018) The Glymphatic System in Central Nervous System Health and Disease: Past, Present, and Future. *Annu Rev Pathol* 13:379-394.
- Portilla D, Shah SV, Lehman PA, Creer MH (1994) Role of cytosolic calcium-independent plasmalogen-selective phospholipase A2 in hypoxic injury to rabbit proximal tubules. *The Journal of clinical investigation* 93:1609-1615.
- Ramakers GM, Storm JF (2002) A postsynaptic transient K(+) current modulated by arachidonic acid regulates synaptic integration and threshold for LTP induction in hippocampal pyramidal cells. *Proc Natl Acad Sci U S A* 99:10144-10149.
- Rangroo Thrane V, Thrane AS, Plog BA, Thiyagarajan M, Iliff JJ, Deane R, Nagelhus EA, Nedergaard M (2013a) Paravascular microcirculation facilitates rapid lipid transport and astrocyte signaling in the brain. *Sci Rep* 3:2582.
- Rangroo Thrane V, Thrane AS, Wang F, Cotrina ML, Smith NA, Chen M, Xu Q, Kang N, Fujita T, Nagelhus EA, Nedergaard M (2013b) Ammonia triggers neuronal disinhibition and seizures by impairing astrocyte potassium buffering. *Nat Med* 19:1643-1648.
- Rosenegger DG, Tran CH, Wamsteeker Cusulin JI, Gordon GR (2015) Tonic Local Brain Blood Flow Control by Astrocytes Independent of Phasic Neurovascular Coupling. *The Journal of neuroscience : the official journal of the Society for Neuroscience* 35:13463-13474.
- Sang N, Zhang J, Marcheselli V, Bazan NG, Chen C (2005) Postsynaptically synthesized prostaglandin E2 (PGE2) modulates hippocampal synaptic transmission via a presynaptic PGE2 EP2 receptor. *J Neurosci* 25:9858-9870.
- Schaeffer EL, Gattaz WF (2007) Requirement of hippocampal phospholipase A2 activity for long-term memory retrieval in rats. *J Neural Transm* 114:379-385.
- Seegers HC, Gross RW, Boyle WA (2002) Calcium-independent phospholipase A(2)-derived arachidonic acid is essential for endothelium-dependent relaxation by acetylcholine. *J Pharmacol Exp Ther* 302:918-923.
- Sekiyama N, Mizuta S, Hori A, Kobayashi S (1995) Prostaglandin E2 facilitates excitatory synaptic transmission in the nucleus tractus solitarius of rats. *Neurosci Lett* 188:101-104.
- Shigetomi E, Bowser DN, Sofroniew MV, Khakh BS (2008) Two forms of astrocyte calcium excitability have distinct effects on NMDA receptor-mediated slow inward currents in pyramidal neurons. *J Neurosci* 28:6659-6663.
- Silva GA, Theriault E, Mills LR, Pennefather PS, Feeney CJ (1999) Group I and II metabotropic glutamate receptor expression in cultured rat spinal cord astrocytes. *Neurosci Lett* 263:117-120.
- Sinclair AJ (1975) Long-chain polyunsaturated fatty acids in the mammalian brain. *The Proceedings of the Nutrition Society* 34:287-291.
- Singaravelu K, Lohr C, Deitmer JW (2006) Regulation of store-operated calcium entry by calcium-independent phospholipase A2 in rat cerebellar astrocytes. *J Neurosci* 26:9579-9592.
- Smith NA, Bekar LK, Nedergaard M (2019) Astrocytic Endocannabinoids Mediate Hippocampal Transient Heterosynaptic Depression. *Neurochem Res*.
- Smith NA, Kress BT, Lu Y, Chandler-Militello D, Benraiss A, Nedergaard M (2018) Fluorescent Ca(2+) indicators directly inhibit the Na,K-ATPase and disrupt cellular functions. *Sci Signal* 11.

- Srinivasan R, Huang BS, Venugopal S, Johnston AD, Chai H, Zeng H, Golshani P, Khakh BS (2015) Ca<sup>2+</sup> signaling in astrocytes from Ip3r2(-/-) mice in brain slices and during startle responses in vivo. *Nat Neurosci* 18:708-717.
- Stella N, Tence M, Glowinski J, Premont J (1994) Glutamate-evoked release of arachidonic acid from mouse brain astrocytes. *J Neurosci* 14:568-575.
- Stella N, Estelles A, Siciliano J, Tence M, Desagher S, Piomelli D, Glowinski J, Premont J (1997) Interleukin-1 enhances the ATP-evoked release of arachidonic acid from mouse astrocytes. *J Neurosci* 17:2939-2946.
- Strokin M, Sergeeva M, Reiser G (2003) Docosahexaenoic acid and arachidonic acid release in rat brain astrocytes is mediated by two separate isoforms of phospholipase A2 and is differently regulated by cyclic AMP and Ca<sup>2+</sup>. *Br J Pharmacol* 139:1014-1022.
- Strokin M, Chechneva O, Reymann KG, Reiser G (2006) Neuroprotection of rat hippocampal slices exposed to oxygen-glucose deprivation by enrichment with docosahexaenoic acid and by inhibition of hydrolysis of docosahexaenoic acid-containing phospholipids by calcium independent phospholipase A2. *Neuroscience* 140:547-553.
- Sun GY, Xu J, Jensen MD, Simonyi A (2004) Phospholipase A2 in the central nervous system: implications for neurodegenerative diseases. *Journal of lipid research* 45:205-213.
- Sun GY, Xu J, Jensen MD, Yu S, Wood WG, Gonzalez FA, Simonyi A, Sun AY, Weisman GA (2005) Phospholipase A2 in astrocytes: responses to oxidative stress, inflammation, and G protein-coupled receptor agonists. *Mol Neurobiol* 31:27-41.
- Sun W, McConnell E, Pare JF, Xu Q, Chen M, Peng W, Lovatt D, Han X, Smith Y, Nedergaard M (2013) Glutamate-dependent neuroglial calcium signaling differs between young and adult brain. *Science* 339:197-200.
- Takano T, Tian GF, Peng W, Lou N, Libionka W, Han X, Nedergaard M (2006) Astrocyte-mediated control of cerebral blood flow. *Nat Neurosci* 9:260-267.
- Talbot MJ, Sayer RJ (1996) Intracellular QX-314 inhibits calcium currents in hippocampal CA1 pyramidal neurons. *Journal of neurophysiology* 76:2120-2124.
- Tamaru Y, Nomura S, Mizuno N, Shigemoto R (2001) Distribution of metabotropic glutamate receptor mGluR3 in the mouse CNS: differential location relative to pre- and postsynaptic sites. *Neuroscience* 106:481-503.
- Tang W, Szokol K, Jensen V, Enger R, Trivedi CA, Hvalby O, Helm PJ, Looger LL, Sprengel R, Nagelhus EA (2015) Stimulation-evoked Ca<sup>2+</sup> signals in astrocytic processes at hippocampal CA3-CA1 synapses of adult mice are modulated by glutamate and ATP. *The Journal of neuroscience : the official journal of the Society for Neuroscience* 35:3016-3021.
- Tay HK, Melendez AJ (2004) FcγRI-triggered generation of arachidonic acid and eicosanoids requires iPLA2 but not cPLA2 in human monocytic cells. *J Biol Chem* 279:22505-22513.
- van Tol-Steye H, Lodder JC, Mansvelter HD, Planta RJ, van Heerikhuizen H, Kits KS (1999) Roles of G-protein beta gamma, arachidonic acid, and phosphorylation inconvergent activation of an S-like potassium conductance by dopamine, Ala-Pro-Gly-Trp-NH<sub>2</sub>, and Phe-Met-Arg-Phe-NH<sub>2</sub>. *J Neurosci* 19:3739-3751.
- Villarroel A, Schwarz TL (1996) Inhibition of the Kv4 (Shal) family of transient K<sup>+</sup> currents by arachidonic acid. *The Journal of neuroscience : the official journal of the Society for Neuroscience* 16:2522-2532.

- Wang F, Smith NA, Xu Q, Fujita T, Baba A, Matsuda T, Takano T, Bekar L, Nedergaard M (2012) Astrocytes modulate neural network activity by Ca<sup>2+</sup>-dependent uptake of extracellular K<sup>+</sup>. *Sci Signal* 5:ra26.
- Wang X, Lou N, Xu Q, Tian GF, Peng WG, Han X, Kang J, Takano T, Nedergaard M (2006) Astrocytic Ca<sup>2+</sup> signaling evoked by sensory stimulation in vivo. *Nature neuroscience* 9:816-823.
- Wilson RJ, Giblin GM, Roomans S, Rhodes SA, Cartwright KA, Shield VJ, Brown J, Wise A, Chowdhury J, Pritchard S, Coote J, Noel LS, Kenakin T, Burns-Kurtis CL, Morrison V, Gray DW, Giles H (2006) GW627368X ((N-{2-[4-(4,9-diethoxy-1-oxo-1,3-dihydro-2H-benzo[f]isoindol-2-yl)phenyl]acetyl} benzene sulphonamide): a novel, potent and selective prostanoid EP4 receptor antagonist. *Br J Pharmacol* 148:326-339.
- Windrem MS, Nunes MC, Rashbaum WK, Schwartz TH, Goodman RA, McKhann G, 2nd, Roy NS, Goldman SA (2004) Fetal and adult human oligodendrocyte progenitor cell isolates myelinate the congenitally dysmyelinated brain. *Nat Med* 10:93-97.
- Windrem MS, Schanz SJ, Guo M, Tian GF, Washco V, Stanwood N, Rasband M, Roy NS, Nedergaard M, Havton LA, Wang S, Goldman SA (2008) Neonatal chimerization with human glial progenitor cells can both remyelinate and rescue the otherwise lethally hypomyelinated shiverer mouse. *Cell stem cell* 2:553-565.
- Winstead MV, Balsinde J, Dennis EA (2000) Calcium-independent phospholipase A(2): structure and function. *Biochimica et biophysica acta* 1488:28-39.
- Wolf MJ, Gross RW (1996) The calcium-dependent association and functional coupling of calmodulin with myocardial phospholipase A2. Implications for cardiac cycle-dependent alterations in phospholipolysis. *J Biol Chem* 271:20989-20992.
- Wolf MJ, Wang J, Turk J, Gross RW (1997) Depletion of intracellular calcium stores activates smooth muscle cell calcium-independent phospholipase A2. A novel mechanism underlying arachidonic acid mobilization. *J Biol Chem* 272:1522-1526.
- Wroblewska B, Wroblewski JT, Pshenichkin S, Surin A, Sullivan SE, Neale JH (1997) N-acetylaspartylglutamate selectively activates mGluR3 receptors in transfected cells. *J Neurochem* 69:174-181.
- Yang HC, Mosior M, Ni B, Dennis EA (1999) Regional distribution, ontogeny, purification, and characterization of the Ca<sup>2+</sup>-independent phospholipase A2 from rat brain. *J Neurochem* 73:1278-1287.
- Yang Y, Ge W, Chen Y, Zhang Z, Shen W, Wu C, Poo M, Duan S (2003) Contribution of astrocytes to hippocampal long-term potentiation through release of D-serine. *Proc Natl Acad Sci U S A* 100:15194-15199.
- Yu X, Taylor AMW, Nagai J, Golshani P, Evans CJ, Coppola G, Khakh BS (2018) Reducing Astrocyte Calcium Signaling In Vivo Alters Striatal Microcircuits and Causes Repetitive Behavior. *Neuron* 99:1170-1187 e1179.
- Zonta M, Angulo MC, Gobbo S, Rosengarten B, Hossmann KA, Pozzan T, Carmignoto G (2003) Neuron-to-astrocyte signaling is central to the dynamic control of brain microcirculation. *Nat Neurosci* 6:43-50.

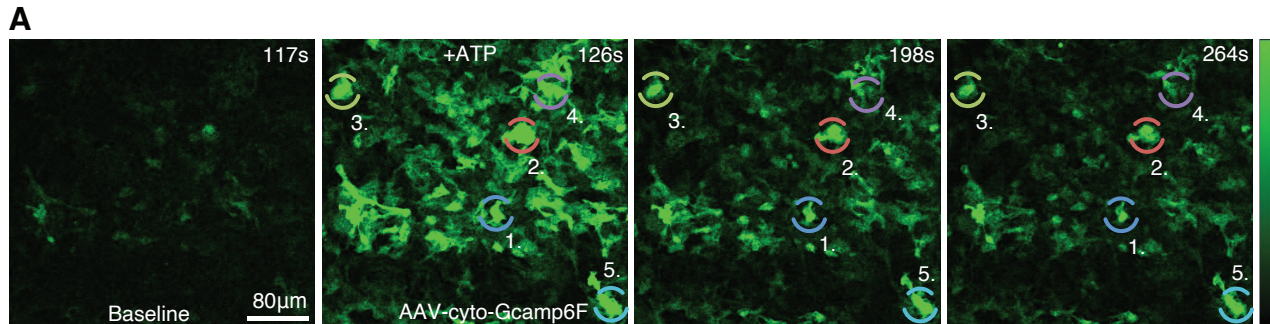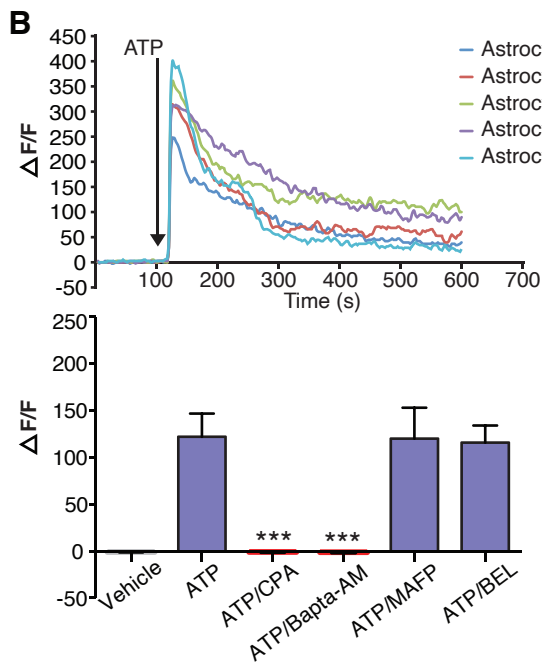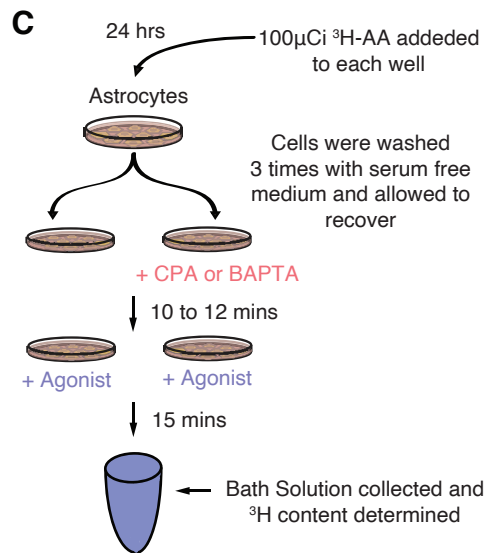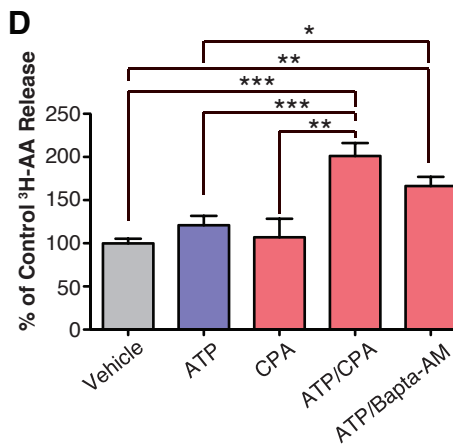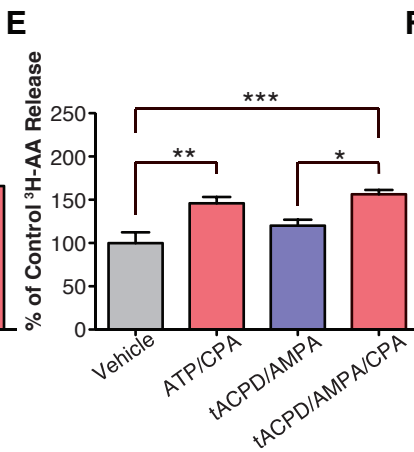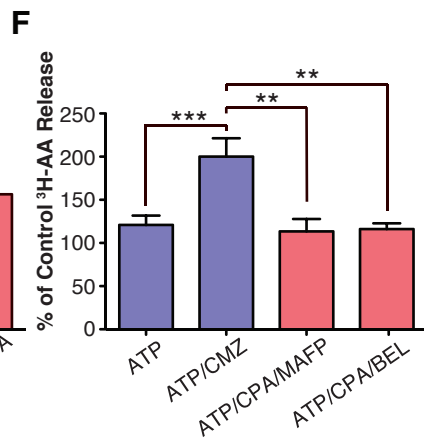

**Figure 1**



**A**

Relative differences of lipid levels in astrocytes treated with CPA and ATP compared to vehicle

| Prostaglandins                         |             |
|----------------------------------------|-------------|
| PGE <sub>2</sub>                       | ↑↑↑         |
| Free fatty acids                       |             |
| Arachidonic acid                       | ↑           |
| Linoleic acid                          | <i>n.d.</i> |
| 2-arachidonoyl-sn-glycerol             |             |
| 2-arachidonoyl- sn-glycerol            | ↑           |
| 2-linoleoyl- sn-glycerol               | <i>n.d.</i> |
| 2-oleoyl- sn-glycerol                  | <i>n.d.</i> |
| -acyl ethanolamine                     |             |
| <i>N</i> -palmitoyl ethanolamine       | ↑↑          |
| <i>N</i> -stearoyl ethanolamine        | ↑↑          |
| <i>N</i> -oleoyl ethanolamine          | ↑↑          |
| <i>N</i> -linoleoyl ethanolamine       | <i>n.d.</i> |
| <i>N</i> -arachidonoyl ethanolamine    | ↑           |
| <i>N</i> -docosahexaenoyl ethanolamine | ↑↑          |
| <i>N</i> -acyl glycine                 |             |
| <i>N</i> -palmitoyl glycine            | <i>n.d.</i> |
| <i>N</i> -stearoyl glycine             | ↑           |
| <i>N</i> -oleoyl glycine               | ↑           |
| <i>N</i> -linoleoyl glycine            | <i>n.d.</i> |
| <i>N</i> -arachidonoyl glycine         | <i>n.d.</i> |
| <i>N</i> -acyl serine                  |             |
| <i>N</i> -palmitoyl serine             | <i>n.d.</i> |
| <i>N</i> -stearoyl serine              | <i>n.d.</i> |
| <i>N</i> -oleoyl serine                | <i>n.d.</i> |
| <i>N</i> -arachidonoyl serine          | <i>n.d.</i> |
| <i>N</i> -acyl taurine                 |             |
| <i>N</i> -arachidonoyl taurine         | ↑           |
| <i>N</i> -acyl tyrosine                |             |
| <i>N</i> -palmitoyl tyrosine           | ↑           |
| <i>N</i> -stearoyl tyrosine            | ↑           |
| <i>N</i> -oleoyl tyrosine              | ↑           |
| <i>N</i> -arachidonoyl tyrosine        | <i>n.d.</i> |
| <i>N</i> -docosahexaenoyl tyrosine     | ↑           |
| <i>N</i> -acyl tryptophan              |             |
| <i>N</i> -palmitoyl tryptophan         | <i>n.d.</i> |
| <i>N</i> -oleoyl tryptophan            | <i>n.d.</i> |
| <i>N</i> -docosahexaenoyl tryptophan   | <i>n.d.</i> |
| Magnitude Differences                  |             |
| 2-2.99 times higher                    | ↑↑↑         |
| 1.50-1.99 times higher                 | ↑↑          |
| 1-1.49 times higher                    | ↑           |
| Significant Differences                |             |
| Significant increase $p < 0.05$        |             |
| Significant increase $p < 0.05-0.10$   |             |
| no difference between groups           | <i>n.d.</i> |

**B**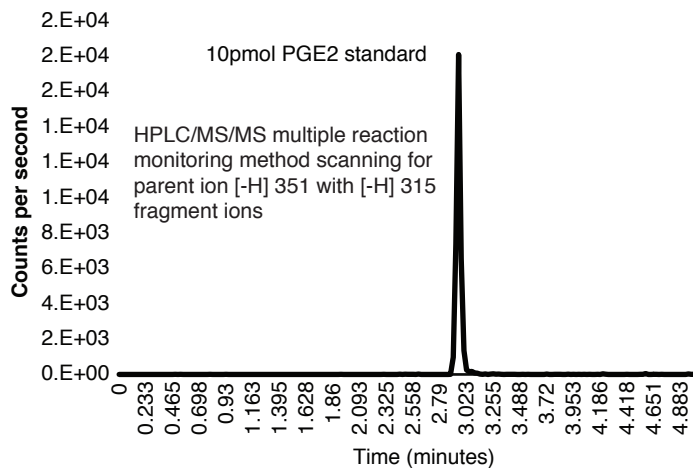**C**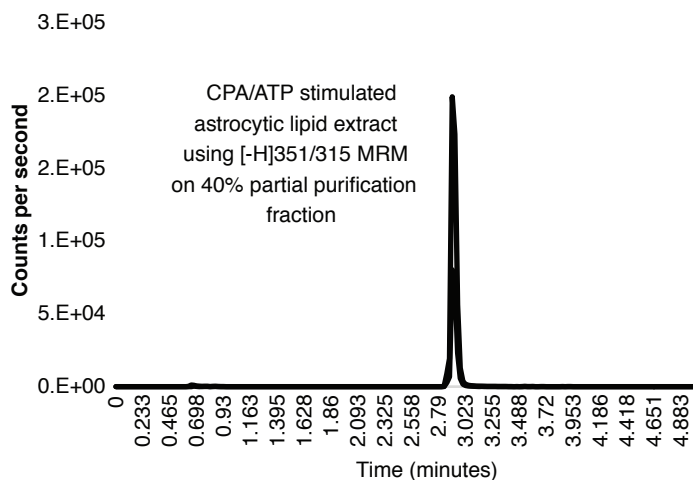**D**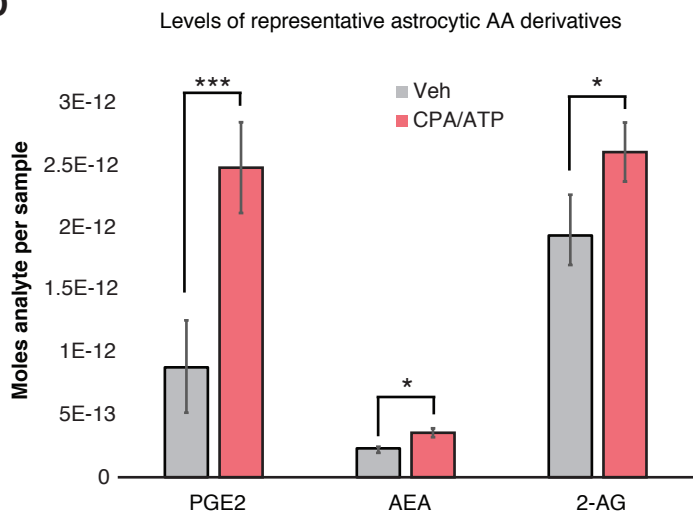

**Figure 2**

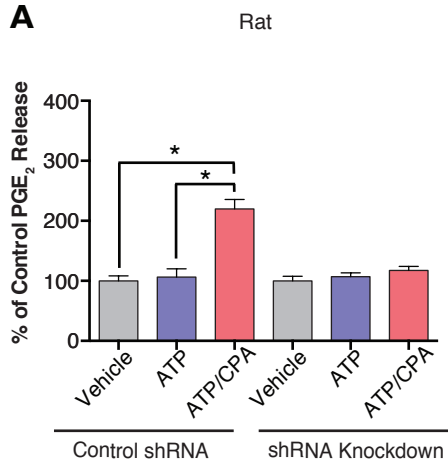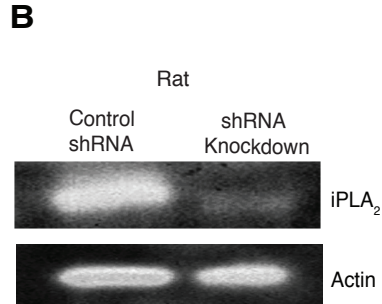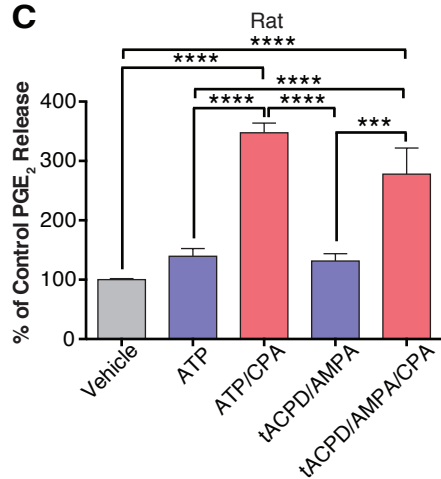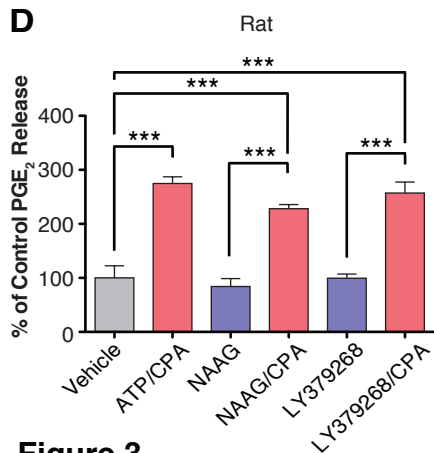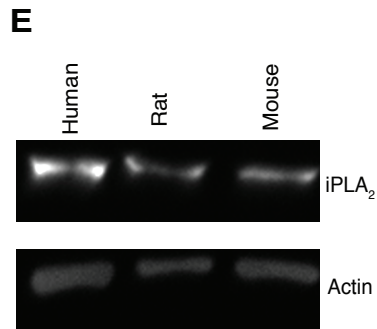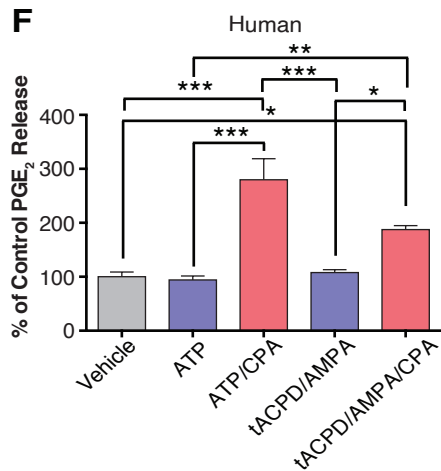

**Figure 3**

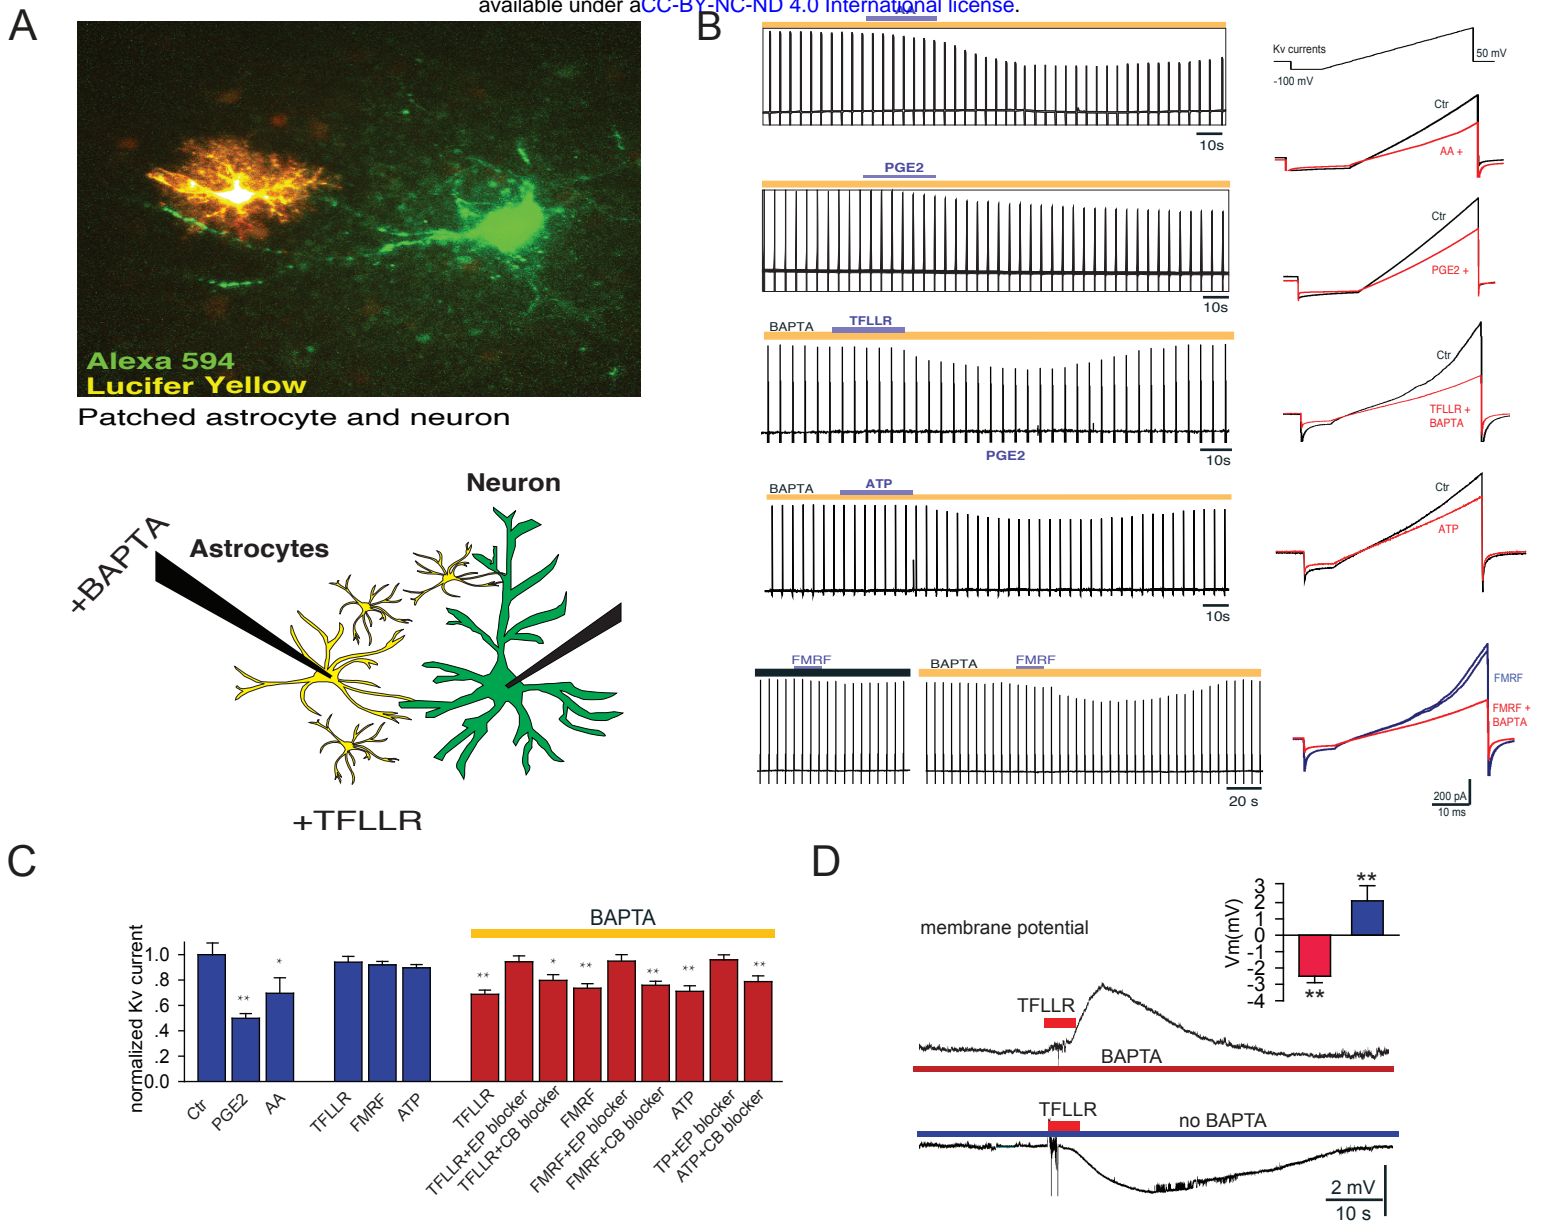

Figure 4

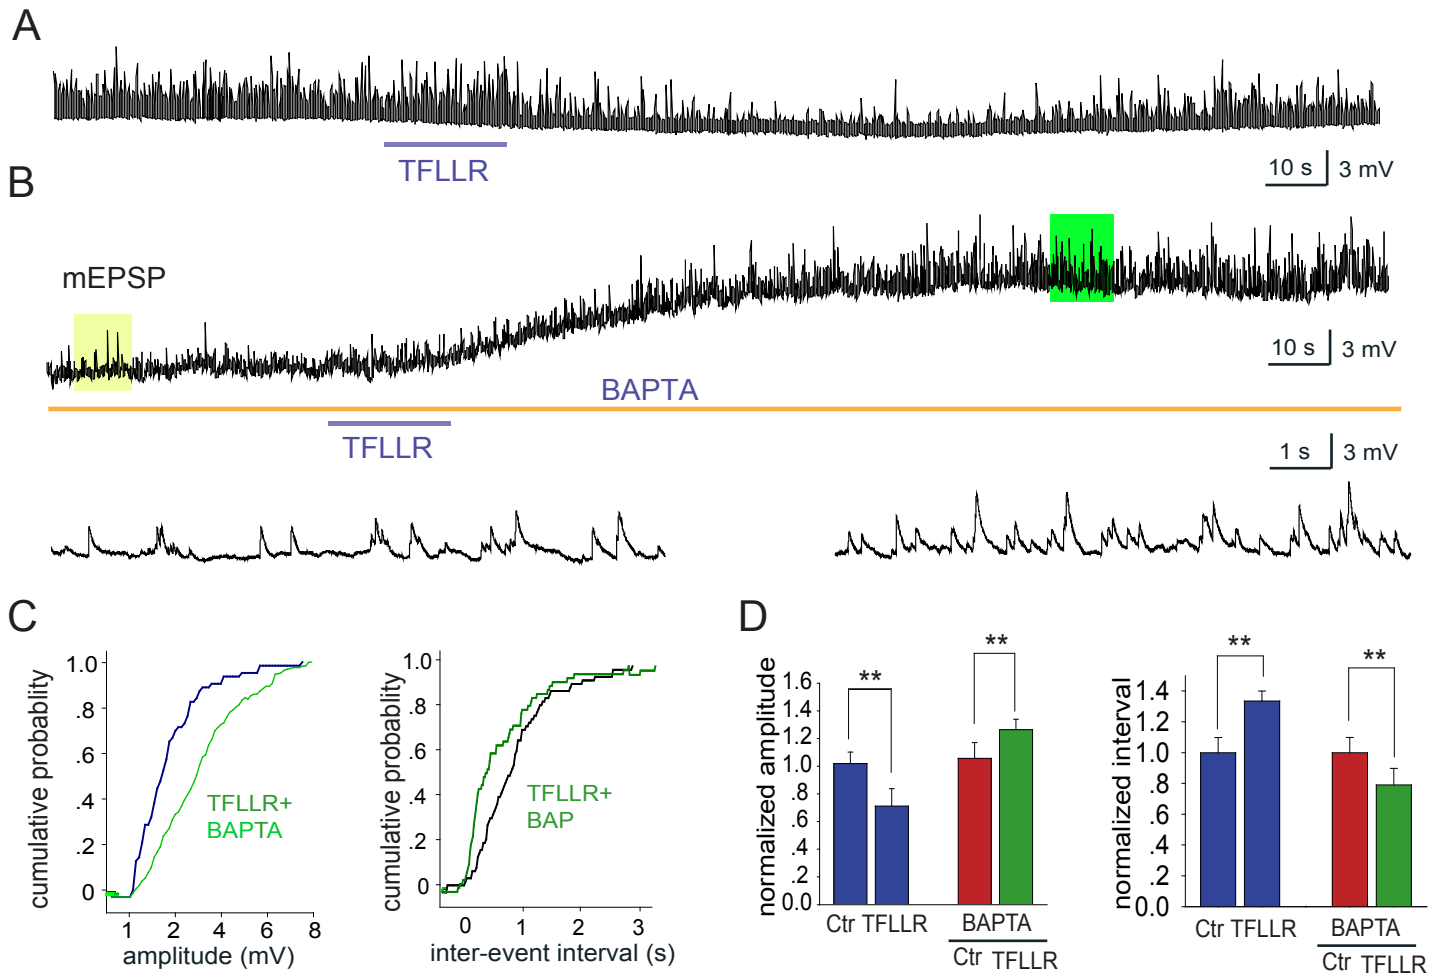

**Figure 5**

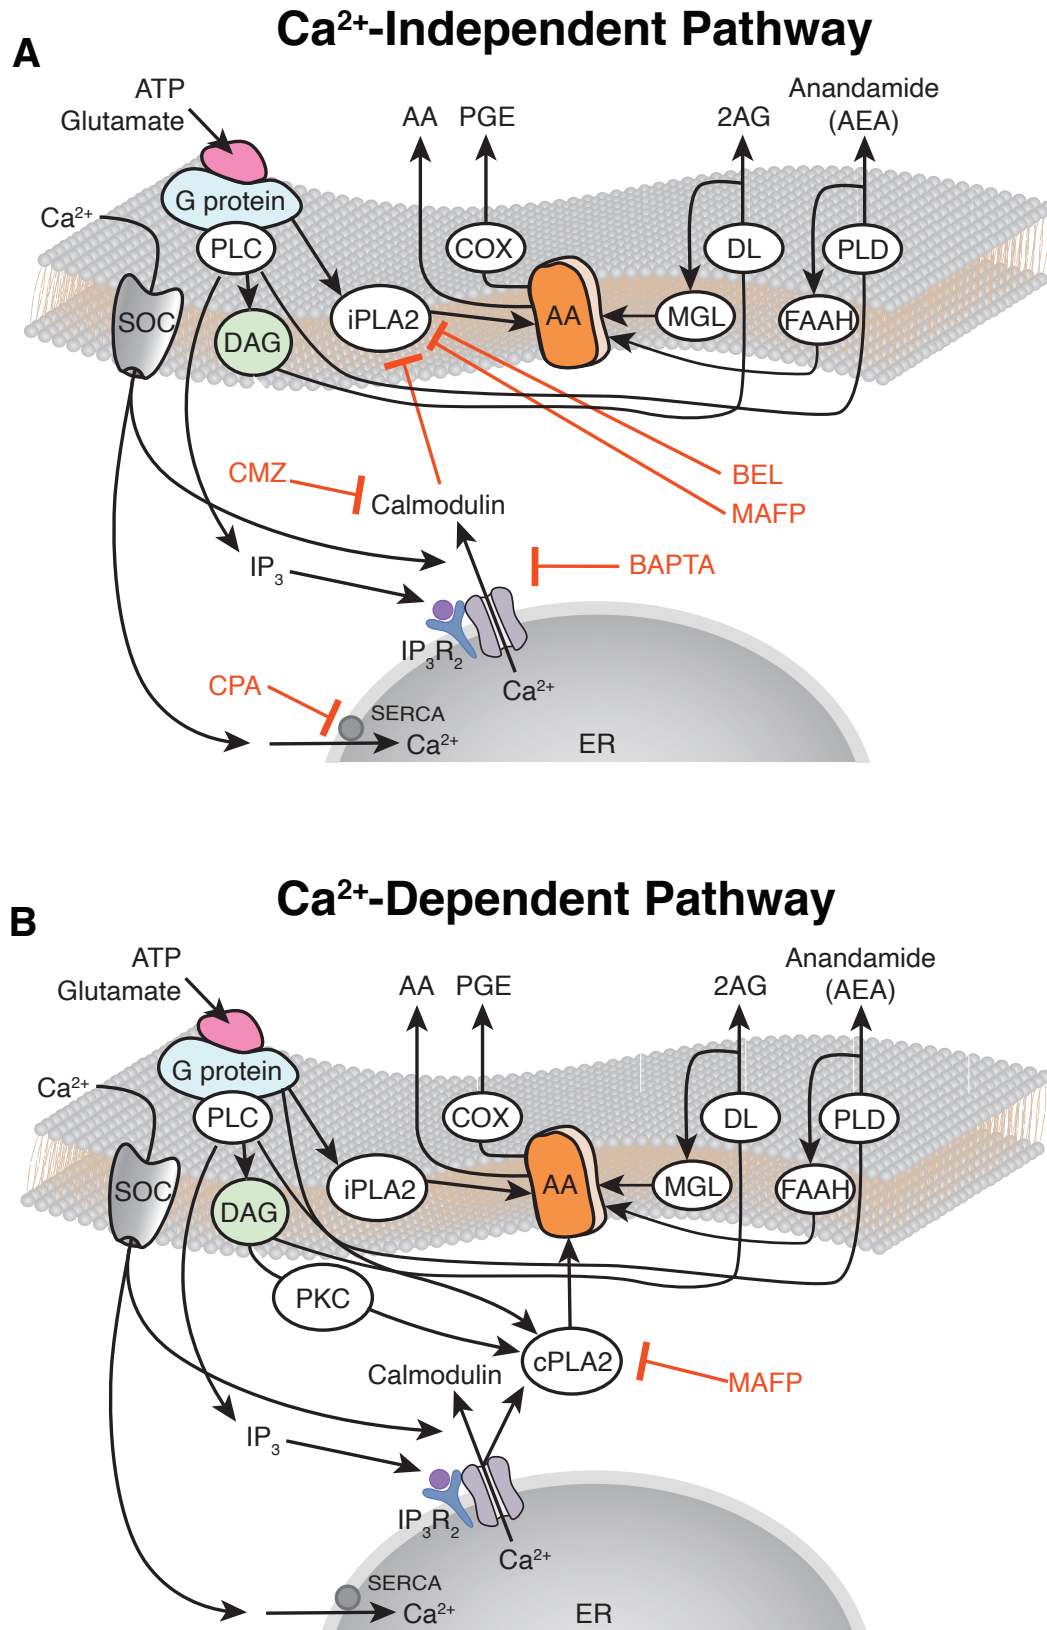

Figure 6
